# Supplementary material
Source: ML conference proceedings conference paper supplement (https://openreview.net/forum?id=KBJSV1XApq)
Supplement: supplementary_material [file Unlearning.pdf › Unlearning.pdf]

---

# Ascent Fails to Forget

---

Anonymous Author(s)

Affiliation

Address

email

## Abstract

Contrary to common belief, we show that gradient ascent-based unconstrained optimization methods frequently fail to perform machine unlearning, a phenomenon we attribute to the inherent statistical dependence between the forget and retain data sets. This dependence, which can manifest itself even as simple correlations, undermines the misconception that these sets can be independently manipulated during unlearning. We provide empirical and theoretical evidence showing these methods often fail precisely due to this overlooked relationship. For random forget sets, this dependence means that degrading forget set metrics (which, for the oracle, should mirror test set metrics) inevitably harms overall test performance. Going beyond random sets, we consider logistic regression as an instructive example where a critical failure mode emerges: inter-set dependence causes gradient descent-ascent iterations to progressively diverge from the oracle. Strikingly, these methods can converge to solutions that are not only far from the oracle but are potentially even further from it than the original model itself, rendering the unlearning process actively detrimental. A toy example further illustrates how this dependence can trap models in inferior local minima, inescapable via finetuning. Our findings highlight that the presence of such statistical dependencies, even when manifest only as correlations, can be sufficient for ascent-based unlearning to fail. Our theoretical insights are corroborated by experiments on complex neural networks, demonstrating that these methods do not perform as expected in practice due to this unaddressed statistical interplay.

## 1 Introduction

Machine learning models have become an integral part of modern research and development methods, even in sensitive domains such as medicine, chemistry, and cybersecurity. This integration has led to growing concerns over data privacy and model maintenance. In this context, the process of selectively removing the influence of specific training examples from a trained model, namely machine *unlearning*, has emerged as a strongly desired capability [1]. Machine unlearning [2, 3] has garnered significant attention due to its diverse applications, ranging from addressing toxic or outdated data [4, 5], to resolving copyright concerns in generative models [6–8], and improving LLM alignment [9, 10].

The fundamental challenge in machine unlearning lies in designing efficient *unlearning algorithms* that do not degrade model performance.

Given a model  $h_\theta$  with parameters  $\theta$ , trained on a dataset  $\mathcal{D}$ , and a subset  $\mathcal{F} \subset \mathcal{D}$  to be forgotten, the goal of any unlearning algorithm is to produce a model  $h_\theta^{\text{UL}}$  that effectively simulates a model trained exclusively on the retain set  $\mathcal{R} = \mathcal{D} \setminus \mathcal{F}$  [11]. While retraining from scratch on  $\mathcal{R}$  provides a straightforward solution, it becomes computationally prohibitive on large datasets or as unlearning requests become more frequent.

For convex models, efficient unlearning algorithms with theoretical guarantees have been developed [12–17], which rely on variants of noisy descent algorithms (**no ascent steps**). However, due to the non-convex, non-smooth, and high-dimensional nature of deep neural network architectures, provable guarantees for unlearning are often lacking. Consequently, current methods frequently compromise model accuracy or require substantial modifications to training procedures [18, 19]. A notable recent exception is the rewind method for unlearning proposed by Mu and Klabjan [20], which provides guarantees for the unlearned model. However, this method is expensive, needing either substantial storage (to retain full model states from previous stages) or significant computational effort (due to the requirement of multiple proximal point iterations).

Many widely used and studied unlearning methods in practice [1, 21, 22] typically rely on fine-tuning heuristics to transform the initial model  $h_\theta$  into an empirically unlearned model  $\hat{h}_\theta^{\text{UL}}$ . The underlying idea of these methods is to reverse the effect that the forget set  $\mathcal{F}$  has had on the model during training. Typically, these methods employ some variant of Gradient Ascent on forget set points and Gradient Descent on retain set points for a small number of fine-tuning epochs [23, 24]. We will refer to these methods as *Descent-Ascent (DA)* unlearning algorithms.

Unfortunately, recent evaluations and benchmarks demonstrate that DA approaches can be highly unreliable [25, 21, 26], as they neither possess theoretical performance guarantees nor clear mechanisms defining a stopping criterion for the unlearning process. Additionally, these methods are extremely sensitive to fine-tuning hyperparameters, most crucially the learning rate and the fine-tuning duration.

In this work, we identify an overlooked crucial obstacle for machine unlearning that is not taken into account by DA methods. Concretely, we show that the existence of data dependencies between samples in the forget and retain sets can lead to poor unlearning performance in some cases, as well as complete breakdown, even in convex settings.

Our main contributions can be summarized as follows:

1. We start by empirically showcasing that DA-based methods fail in practical settings under a robust evaluation and discuss limitations of previous methodologies.
2. Supported by our empirical findings, we first show theoretically that unlearning random forget sets is impossible without causing model degradation, as unlearning random sets is equivalent in distribution to unlearning samples from the population data distribution.
3. We move beyond forget and retain sets which share clear statistical dependencies to analyze the simple setting of multi-dimensional logistic regression, where we show inter-set correlations lead to DA failure modes.
4. In our logistic regression analysis, we differentiate the impact of DA unlearning based on forget set size. We specifically show that for certain forget set sizes, DA can be harmful to the model, even when employing arbitrary early stopping.
5. Finally, using low-dimensional examples, we demonstrate how DA can lead the model to suboptimal local minima, which do not align with the minima achieved through retraining.

**Notation:** We will use the following notation. We use uppercase bold letters for matrices  $\mathbf{X} \in \mathbb{R}^{m \times n}$ , lowercase bold letters for vectors  $\mathbf{x} \in \mathbb{R}^m$  and lowercase letters for numbers  $x \in \mathbb{R}$ . Accordingly, the  $i^{\text{th}}$  row and the element in the  $i, j$  position of a matrix  $\mathbf{X}$  are given by  $\mathbf{x}_i$  and  $x_{ij}$  respectively. We use the shorthand  $[n] = \{1, \dots, n\}$  for any natural number  $n$ . Let  $\mathbb{1}_{(\cdot, \cdot)} : \mathbb{R} \times \mathbb{R} \rightarrow \{0, 1\}$  such that  $\mathbb{1}_{(x, x)} = 1$ , otherwise for  $x \neq y$ ,  $\mathbb{1}_{(x, y)} = 0$ . We will denote our model with parameters  $\theta$  as  $h_\theta : \mathbb{R}^d \rightarrow \mathbb{R}$ . We define a training dataset of size  $|\mathcal{D}|$  as a set of samples and labels  $\{(x_i, y_i)\}_{i=1}^{|\mathcal{D}|} = \mathcal{D}$ , composed of a “retain” set  $\mathcal{R}$  and “forget” set  $\mathcal{F}$  such that  $|\mathcal{D}| = |\mathcal{R}| + |\mathcal{F}|$ . We take “ascent” optimization on a sample to mean computing the gradient update w.r.t. to a loss  $\nabla_\theta \ell$  and flipping its sign when updating the model parameters.

## 2 Related Work

**Machine unlearning:** Unlearning methods can be used to either remove particular samples [11, 1, 27, 12, 18], or to remove subsets of the data which share certain underlying features, captured by abstract concepts [28–31]. In this work, we focus on the prior, though we believe some of our results may be extended to the latter setting. Exact unlearning methods [18] offer theoretical guarantees but often sacrifice accuracy, leading to widespread adoption of approximate methods in deep learning. These approximate approaches are evaluated through membership inference attacks [22, 32, 25] and

backdoor removal capabilities [4]. As Thudi et al. [33] note, meaningful evaluation must focus on algorithmic behavior rather than individual models due to deep learning’s stochastic nature. For a review of open problems in machine unlearning, see [34] and references therein.

**Unlearning approaches in deep learning.** Current approaches primarily use gradient-based methods, including partial fine-tuning [32], AD combinations [21], and sparsity-regularized fine-tuning [35]. Alternative methods employ local quadratic approximations [22, 36] or influence functions [37]. One of the most used unlearning methods, SCRUB [25] fine-tunes models using KL divergence objectives, but faces similar underlying challenges as other methods. The approach presented in Georgiev et al. [38] introduces a predictive data attribution approach with good unlearning quality under a robust evaluation, although it raises some scalability concerns if we account for the full cost of the method. In this work we focus on DA based methods.

### 3 Ascent Methods Fail in the Wild

To evaluate the quality of unlearning rigorously, we adopt the KLoM (KL Divergence of Margins [38]) metric, which quantifies the distributional difference in predictions between the unlearned model and the oracle model. KLoM measures the KL-Divergence between the classifier margin distributions of 100 unlearned models against 100 Oracle models. A KLoM score approaching zero, the lowest possible, indicates near-perfect unlearning.

In our main experiments, we examine two gradient-based unlearning approaches which are commonly used as baselines: Gradient Ascent (GA) which performs steps in the direction of the gradients of the model on forget set, and Gradient Descent/Ascent (GDA) which adds descent steps on the retain set after the initial ascent steps, for each epoch. We conduct these experiments using ResNet-9 models on Cifar-10 [39] under forget sets of different sizes and properties. Fig. 1 illustrates our results on a selected forget set. We observe that both GA and GDA methods either fail to substantially move away from the pretrained initialization or severely degrade model performance. Our choices in model, dataset, forget sets and results are consistent with the values reported in Georgiev et al. [38].

These outcomes highlight an important limitation in the empirical evaluation of GA based unlearning methods. It is necessary for a hyperparameter selection criteria to be defined, ideally, before deploying the method or at least without measuring at the final target metric. It is not fair to do an instance-specific selection of the best run after having seen the evaluation due to bias. For a small enough forget set and a large enough grid of runs with different hyperparameters we could trick ourselves into a false sense of unlearning even with vanilla GA. This problem is showcased in Fig. 2 and is rooted in the missing targets problem [25, 38], which amounts to the difficulty of not having a target stopping value for GA based unlearning optimization procedures. On top of that, different points seem to unlearn at different rates [38] which suggests that such a stopping value would need to be point-specific.

We also observe that the difficulty of unlearning varies greatly depending on the specific forget set selected, as shown in Fig. 3. In general, we find GA and GDA methods to be fragile. The extreme sensitivity to hyperparameters, unclear stopping criteria for Gradient Ascent, and substantial computational costs in using Gradient Descent on the retain set to fix models, severely restrict their practicality. Fundamentally, performing gradient ascent on individual points is not aligned with the core definition of unlearning, making these approaches unsuitable for reliable and consistent machine unlearning in real-world scenarios. In the Appendix, we include the methodology details for forget sets, KLoM, hyperparameters along with additional results on more forget sets, models (ResNet-18 [40]) and datasets (ImageNetLiving-17 [41, 42]).

Motivated by these results, the following sections aim to demonstrate that the underlying statistical data dependencies may be a central cause for the typical failure modes of DA based unlearning methods, both in general, and in some useful tractable settings.

### 4 Unlearning and Random Sets

A natural starting point for understanding how data correlations influence the unlearning process is that of random forget sets. If a forget set is selected uniformly at random from the original set, it is evident that the two sets would have high statistical dependence between them. Therefore, we would

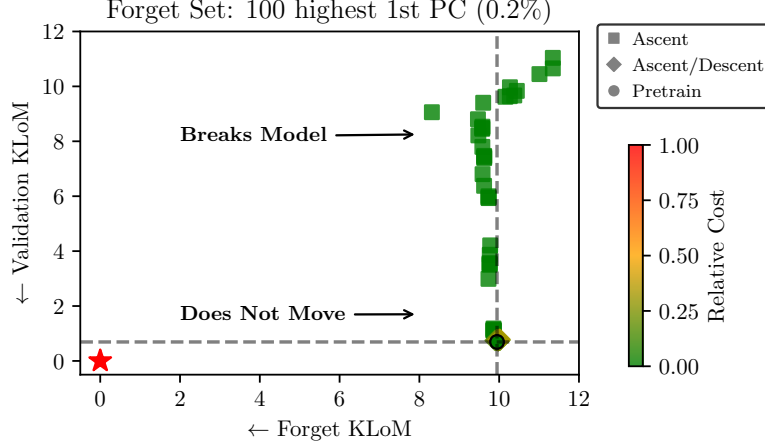

Figure 1: **Ascent Fails to Forget.** We apply Gradient Ascent and Gradient Descent/Ascent to Pretrained models to unlearn a selected forget set containing points of the first Principal Component (PC) of the influence matrix from Cifar-10. KLoM scores (x-axis, y-axis) measure the quality of unlearning on a given set by comparing the distribution distance between unlearned predictions and Oracle predictions (0 means perfect unlearning  $\star$ ). We measure KLoM values over each data-point in a set and report the 95th percentile in each group. Different (x/y) points in the plot represent results for different unlearning method hyper-parameters. The colors indicate what is the relative cost of an unlearning method when compared to fully retraining the model. A Pretrained model ( $\circ$ ) is similar to an Oracle on the validation set but very different on the forget set. On such set, unlearning with Gradient Ascent or Gradient Descent/Ascent either breaks the model or does not move much from the Pretrained starting point, we find this behavior to be consistent in most sets. Forget set selection and KLoM score metric follow Georgiev et al. [38]. Further details on method and evaluation hyper-parameters can be found in the Appendix.

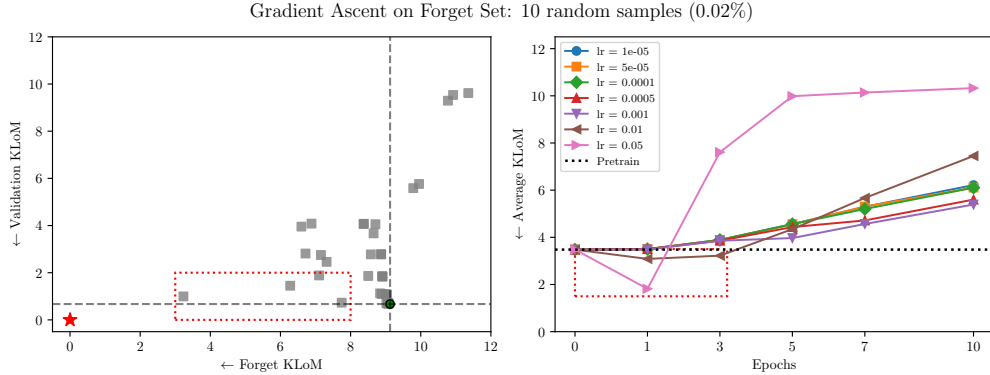

Figure 2: **The Ascent Forgets Illusion.** The left plot shows KLoM scores of Gradient Ascent when unlearning just 10 random samples (axis and points follow Fig. 1). Some runs (---) seem to achieve unlearning without breaking the model. On the right, we present the average KLoM between retain, validation and forget sets (y-axis) along time of unlearning (x-axis). We observe that in order for Gradient Ascent to unlearn such (easy) sets in practice, one would need to (i): select the learning rate, (ii) know when to stop fine-tuning.

142 naturally expect that metrics measured in the forget set would be indistinguishable those of the test  
 143 set and very close to those of the retain for the oracle. We can state this formally in Lemma 1, for the  
 144 Accuracy, while it follows in like manner for other metrics, the proof of Lemma 1 can be found in  
 145 App. B.

146 **Lemma 1** (Random Sets). *Given a true distribution of samples  $P_{\mathcal{T}}$  and a forget set  $\mathcal{F}$  chosen*  
 147 *uniformly at random from the dataset and a model with parameters  $\theta$ , then the probability that the*  
 148 *accuracy on the test set  $\text{Acc}_{\mathcal{T}}$  and the forget set  $\text{Acc}_{\mathcal{F}}$  diverge from one another by more than  $\epsilon$  is*

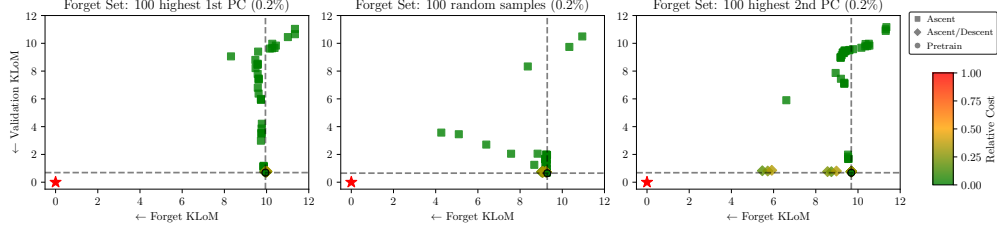

Figure 3: **Different Unlearning Difficulties.** We present the KLoM scores of Gradient Ascent and Gradient Descent/Ascent when unlearning over different forget sets (axes and points follow Fig. 1). In general, the majority of runs either do nothing or break the model. Empirically, we find highly important points (left) to be the hardest to unlearn with zero realizations showing any unlearning signs at all. Random samples (center) show some Gradient Ascent runs improving the forget KLoM but with significant degradation in the models. Finally, for a set with second PC points (right) we observe some Gradient Descent/Ascent runs improve the forget KLoM without breaking the model but at a high cost, around 25% of retraining an Oracle for unlearning 0.2% of the data.

149 *upperbounded by the following inequality:*

$$P(|Acc_{\mathcal{T}} - Acc_{\mathcal{F}}| \geq \epsilon) \leq 2 \exp(-2|\mathcal{F}|\epsilon^2).$$

150 Lemma 1 suggests that methods based on DA that degrade a metric on the forget set, might be more  
151 harmful rather than beneficial. This observation raises the following question:

152 *(I) Do data dependencies, in general, cause DA methods to have a detrimental effect on the models,*  
153 *without actually unlearning?*

154 While the answer to this question under statistical dependencies is apparently positive, as stated  
155 in Lemma 1, when considering limited data dependencies, the answer becomes more convoluted.  
156 Before proceeding to the discussion regarding this, we would like to point out that a “good” unlearning  
157 algorithm should not be harmful to the model regardless of the input forget set  $\mathcal{F}$ , even for random  
158 sets.

159 In the following sections, we analyze several tractable scenarios. We find that in many cases the  
160 answer to (I) is positive, implying that data dependencies do, in fact, cause DA methods to have a  
161 detrimental effect on the models.

## 162 5 Models Diverge from Retraining Solutions Under DA Unlearning

163 We begin our study with logistic regression in a high-dimensional, nearly orthogonal setting where cor-  
164 relations are only between samples on the same dimension. We then generalize to cross-dimensional  
165 correlations, and finally study a nonlinear example in low-dimensions with on a small fixed dataset.

### 166 5.1 High Dimensions: Correlated Data Causes Diverging Solutions in Logistic Regression

167 Here, we study the problem of binary logistic regression with a ridge parameter  $\lambda$ , and weights  $\mathbf{w}$   
168 on nearly orthogonal data in  $d$  dimensions. Based on the work of Soudry et al. [43], we use the  
169 exponential loss  $\ell_i = e^{y_i h_{\theta}(\mathbf{x}_i)}$  as a more tractable proxy for the logistic loss. The pre-training ( $\mathcal{D}$ ),  
170 retraining ( $\mathcal{R}$ ) and GDA optimization methods (DA) will minimize their respective losses

$$\begin{aligned} \mathcal{L}_{\mathcal{D}} &= \frac{1}{|\mathcal{D}|} \sum_{i=1}^{\mathcal{D}} e^{-y_i \cdot \langle \mathbf{w}, \mathbf{x}_i \rangle} + \frac{\lambda}{2} \|\mathbf{w}\|_2^2, & \mathcal{L}_{\mathcal{R}} &= \frac{1}{|\mathcal{R}|} \sum_{i=1}^{\mathcal{R}} e^{-y_i \cdot \langle \mathbf{w}, \mathbf{x}_i \rangle} + \frac{\lambda}{2} \|\mathbf{w}\|_2^2, \\ \mathcal{L}_{\text{DA}} &= \frac{1}{|\mathcal{R}|} \sum_{i=1}^{\mathcal{R}} e^{-y_i \cdot \langle \mathbf{w}, \mathbf{x}_i \rangle} - \frac{1}{|\mathcal{F}|} \sum_{i=1}^{\mathcal{F}} e^{-y_i \cdot \langle \mathbf{w}, \mathbf{x}_i \rangle} + \frac{\lambda}{2} \|\mathbf{w}\|_2^2. \end{aligned} \tag{1}$$

#### 171 5.1.1 Data Correlations on a Single Dimension

172 We start from the case of a semi orthogonal dataset. Using the following assumptions:

173 **Assumption 1.** *The data is separable into orthogonal sets  $S_j$  for each coordinate  $j$ .*

174 **Assumption 2.** *For a coordinate  $j$  it holds that for all samples  $i$  with  $x_{i,j} \neq 0$ ,  $y_i \cdot x_{i,j} = 1$ .*

175 These assumptions correspond to a dataset in  $d$  dimensions where there are sets of samples on  
 176 orthogonal axes to one another. As a result, data points that lie in different sets  $S_j$ , are perfectly  
 177 orthogonal and uncorrelated; however, data points that lie in the same set are fully correlated with  
 178 one another.

179 Recall our hypothesis that data dependencies can cause DA methods to degrade model metrics,  
 180 instead of converging to an oracle model, we will pick a subset of a set  $S_j$  as our forget set. This will  
 181 allow for a simplistic analysis while testing the hypothesis for a highly correlated forget set.

182 Let  $|\mathcal{R}_j|$  the size of the retain set for samples with  $x_{i,j} \neq 0$ , then in order to model the behavior of  
 183 the minimizers of Eq. (1), for forget sets of different sizes, we define the  $j$ th forget set fraction size  
 184 as  $|\mathcal{F}_j| = \alpha \cdot |\mathcal{R}_j|$ . A simple example of this setting can be a set of retain points of  $x_j = 1, y_j = 1$   
 185 and a set of forget points of  $x_j = -1, y_j = -1$ , where we are practically requested to remove all (or  
 186 some) of the negative samples. The effect of unlearning a forget set on a particular coordinate axis  $j$ ,  
 187 can then be shown to obtain closed form solutions as given by Lemma 2, proven in App. C.2.

188 **Lemma 2** (Closed Form). *Let  $w_j^{\mathcal{D}}, w_j^{\mathcal{R}}$  and  $w_j^{\mathcal{DA}}$  be the  $j$ th coordinate of **any** local minima/maxima  
 189 for the logistic regression problems defined in Eq. (1), then they admit the form:*

$$w_j^{\mathcal{D}} = W\left(\frac{(1+\alpha)|\mathcal{R}_j|}{\lambda|\mathcal{D}|}\right), w_j^{\mathcal{R}} = W\left(\frac{|\mathcal{R}_j|}{\lambda|\mathcal{R}|}\right), w_j^{\mathcal{DA}} = W\left(\frac{(1-\alpha|\mathcal{R}|/|\mathcal{F}|)|\mathcal{R}_j|}{\lambda|\mathcal{R}|}\right),$$

190 where  $W(z)$  corresponds to the Lambert-W function, the solution to  $z = W(z)e^{W(z)}$ .

191 It follows directly from Lemma 2, that by changing the value of  $\alpha$ , which determines the ratio of  
 192 the size of the forget set to that of the retain in this coordinate, the solutions will be ordered by their  
 193 magnitude. Concretely, Lemma 3 shows that the DA solution is always **farthest** away from the  
 194 oracle solution, while the oracle and pre-trained solutions remain close and more importantly the  
 195 DA solution and the oracle solution lie in opposite directions with respect to the initial solution of  
 196 pre-training  $w_j^{\mathcal{D}}$ . This observation implies that performing DA in this setup always converges away  
 197 from the oracle solution, thus doing nothing at all is a better strategy than DA. The aforementioned  
 198 observation can be formally decomposed in the following lemmas. We prove Lemma 3 in App. E,  
 199 which gives a formal statement regarding the fact that the minima of DA and the oracle are in opposite  
 200 directions with respect to the minimum of the initial dataset  $\mathcal{D}$ .

201 **Lemma 3** (Divergence Logistic Regression). *Let  $w_j^{\mathcal{D}}, w_j^{\mathcal{R}}$  and  $w_j^{\mathcal{DA}}$  the  $j$ th coordinate of the conver-  
 202 gence point for the logistic regression problem for the original set  $\mathcal{D}$ , the retain set  $\mathcal{R}$ , and the Descent  
 203 Ascent method respectively. Then for a range of  $\alpha$  we have that:  $(w_j^{\mathcal{DA}} - w_j^{\mathcal{D}}) \cdot (w_j^{\mathcal{D}} - w_j^{\mathcal{R}}) \geq 0$ .*

204 We defer the reader to App. E for the exact range of  $\alpha$ , for which Lemma 3 holds, let us point out that  
 205 the lemma holds for  $\alpha \leq |\mathcal{F}|/|\mathcal{R}|$ , this means that if we were working on a purely 1 dimensional  
 206 dataset, this lemma would **always** hold. Lemma 3 answers our original question of whether data  
 207 correlations cause DA methods to harm the model in the positive. Before proceeding to the study of  
 208 higher dimensions, we would like to comment on the stability of the process of unlearning under DA  
 209 methods.

210 **Stability of DA methods:** We begin by characterizing the distance between the different stationary  
 211 points for the three problems.

212 Lemma 4 provides an upperbound on the distance between the oracle solution and the initial solution  
 213 for  $\mathcal{D}$ . Its counterpart, Lemma 5 provides a lower bound on the distance between the oracle solution  
 214 and the DA solution. The proof for Lemma 4 can be found in App. F, while the proof for Lemma 5  
 215 lies in App. G

216 **Lemma 4** (Distance Growth). *Let  $w_j^{\mathcal{D}}, w_j^{\mathcal{R}}$  the  $j$ th coordinate of the convergence point for the logistic  
 217 regression problem for the original set  $\mathcal{D}$  and the retain set  $\mathcal{R}$  respectively. It holds that the distance  
 218  $\Delta_{\mathcal{R}, \mathcal{D}} = |w_j^{\mathcal{D}} - w_j^{\mathcal{R}}| \leq \left| \ln \left( (1+\alpha) \frac{|\mathcal{R}|}{|\mathcal{D}|} \right) \right|$ , for any value of  $\lambda > 0$ .*

219 **Lemma 5** (Distance Unlearning). *Let  $w_j^{\mathcal{R}}, w_j^{\mathcal{DA}}$  the  $j$ th coordinate of the convergence point for the  
 220 logistic regression problem for the retain set  $\mathcal{R}$  and the Descent Ascent method respectively. It holds  
 221 that for  $\alpha \geq |\mathcal{F}|/|\mathcal{R}|$  the distance  $\Delta_{\mathcal{R}, \mathcal{DA}} = |w_j^{\mathcal{R}} - w_j^{\mathcal{DA}}| \geq W_0(|\mathcal{R}_j|/(\lambda|\mathcal{R}|))$*

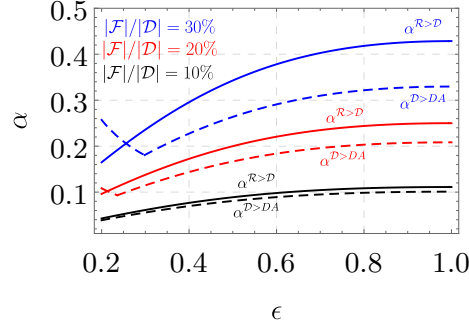

Figure 4: **Cross dimensional data correlations  $\epsilon$  lead DA to failure for a certain range of values.** We present the range of  $\alpha$  as a function of the correlation  $\epsilon$ , for which we can guarantee that DA is detrimental. The (---) lines represent the minimum  $\alpha$  for which the coordinates of the original model become bigger than the coordinates of the DA unlearning algorithm and with the (--) the maximum  $\alpha$  for which the coordinates of the oracle are bigger than those of the original model.

Employing Lemma 4 and Lemma 5, one can derive the following Corollary.

**Corollary 1.** *As the ridge  $\lambda \rightarrow 0$  for  $e_j \rightarrow |\mathcal{F}|/|\mathcal{R}|$ , we have that  $\Delta_{\mathcal{R},\mathcal{D}} \rightarrow 0$  and  $\Delta_{\mathcal{R},\mathcal{DA}} \rightarrow \infty$ .*

Cor. 1 demonstrates how unlearning using DA is very volatile and even a few steps of the method can cause the model to diverge.

**A possible stabilization effect of iterative DA:** So far, we have focused on the behavior of minimizers of Eq. (1), which describes a simultaneous descent-ascent algorithm. In practice, however, iterative methods are typically used, where one first performs a step of ascent on the forget set, followed descent on the retain set. In App. C.3, we show that for small learning rates  $\eta \rightarrow 0$ , the iterative method is nearly identical to the simultaneous update. Namely the derivative used for the update rule is

$$w_j^{t+1} \leftarrow w_j^t - \eta \left( -\frac{|\mathcal{R}_j|}{|\mathcal{R}|} e^{-w_j^t} + \frac{\alpha \cdot |\mathcal{R}_j|}{|\mathcal{F}|} e^{-w_j^t} + 2\lambda w_j^t \right),$$

where the only difference is a factor of 2 in front of the regularization that differs from the normal DA loss. We have omitted a term which is of the order of  $\mathcal{O}(\eta^2)$ , since the solution, should it exist has  $w_j^t$  small and a term with  $\eta^2 \rightarrow 0$  has negligible contribution.

The leading correction term  $\mathcal{O}(\eta^2)$  which was omitted in the update rule above stops the algorithms solution  $w_j^{\text{DA}}$  from diverging, since the term is of the form

$$\eta^2 \alpha \frac{|\mathcal{R}_j|^2}{|\mathcal{F}||\mathcal{R}|} e^{-2w_j^t} - \eta^2 \lambda w_j^t \alpha \frac{|\mathcal{R}_j|}{|\mathcal{F}|} e^{-w_j^t},$$

which increases for larger  $w_j^t$ . This addresses stability concerns; however, it does nothing to remedy our main concern raised in Lemma 3 regarding the harmful effect of these methods on the model.

### 5.1.2 Cross Dimensional Data Correlations

In the previous section we studied the case where our samples are fully correlated, since they existed in a single dimension. In this section we will consider the two dimensional case where we have two sets of samples  $S_i$  and  $S_j$ , which have values  $x_i = (0, \dots, 0, 1, \epsilon, 0, \dots, 0)$  and  $x_j = (0, \dots, 0, \epsilon, 1, 0, \dots, 0)$  respectively. We will consider the case where the samples of  $S_i$  are all in the retain set, while the samples of  $S_j$  are all in the forget. In this case the correlation between the samples in the forget and the retain set depends on  $\epsilon$  and therefore this allows us to do a parametric study of the effect of correlation between the forget and the retain on the performance of DA based methods. In similar fashion to the 1 dimensional case we will consider that the forget set  $|\mathcal{F}_{i,j}| = \alpha |\mathcal{R}_{i,j}|$ , where  $\mathcal{F}_{i,j}$ ,  $\mathcal{R}_{i,j}$  the forget and the retain over the  $i, j$  dimensions, respectively. In order to facilitate the analysis we will change the coordinate system only for the  $i$  and the  $j$  coordinate to  $x = w_i + \epsilon w_j$  and  $y = w_i \epsilon + w_j$ . Let  $x^{\mathcal{R}}, y^{\mathcal{R}}$  the coordinates for the oracle model stationary point,  $x^{\mathcal{D}}, y^{\mathcal{D}}$  for the pretrain model and  $x^{\text{DA}}, y^{\text{DA}}$  for the DA unlearning scheme, we can give the following characterizations:

**Lemma 6.** *The closed form solution for the stationary points for the retrain set is given as:*

$$x^{\mathcal{R}} = W \left( \frac{(1 + \epsilon^2)|R_{i,j}|}{\lambda|\mathcal{R}|} \right), \quad y^{\mathcal{R}} = \frac{2\epsilon}{1 + \epsilon^2} W \left( \frac{(1 + \epsilon^2)|R_{i,j}|}{\lambda|\mathcal{R}|} \right).$$

**Lemma 7.** *For the stationary points of the original set, one can derive the following ranges.*

$$\begin{aligned} W \left( \frac{|R_{i,j}|}{\lambda|\mathcal{D}|} ((1 + \epsilon^2) + 2\alpha\epsilon) \right) &\leq x^{\mathcal{D}} \leq \frac{2\epsilon}{1 + \epsilon^2} W \left( \frac{\alpha(1 + \epsilon^2)|R_{i,j}|}{\lambda|\mathcal{D}|} \right) + W \left( \frac{(1 + \epsilon^2)|R_{i,j}|}{\lambda|\mathcal{D}|} \right), \\ W \left( \frac{\alpha(1 + \epsilon^2)|R_{i,j}|}{\lambda|\mathcal{D}|} \right) &\leq y^{\mathcal{D}} \leq W \left( \frac{|R_{i,j}|}{\lambda|\mathcal{D}|} (2\epsilon + \alpha(1 + \epsilon^2)) \right). \end{aligned}$$

**Lemma 8.** *For the stationary points of the model trained by DA methods we can derive the following ranges.*

$$x^{DA} \leq W \left( \frac{|R_{i,j}|}{\lambda|\mathcal{R}|} (1 + \epsilon^2) - \frac{|R_{i,j}|}{\lambda|\mathcal{F}|} \alpha 2\epsilon \right), \quad y^{DA} \leq W \left( \frac{|R_{i,j}|}{\lambda|\mathcal{R}|} 2\epsilon - \frac{|R_{i,j}|}{\lambda|\mathcal{F}|} \alpha (1 + \epsilon^2) \right).$$

While the problem becomes more complex in this case and to our knowledge it is not possible to compute an exact solution, the above Lemmas provide enough information for our purpose. The proofs for all of these Lemmas can be found in App. H.1. In similar fashion to the 1 dimensional case we would like to show that there exists a reasonable  $\alpha$ , for which we have that  $(x^{\mathcal{R}} - x^{\mathcal{D}}) \cdot (x^{\mathcal{D}} - x^{DA}) \geq 0$  and at the same time  $(y^{\mathcal{R}} - y^{\mathcal{D}}) \cdot (y^{\mathcal{D}} - y^{DA}) \geq 0$ .

**Lemma 9.** *For  $\alpha \geq \alpha^{\mathcal{D} > DA} = \max \left\{ \frac{1 + \epsilon^2}{2\epsilon} \frac{|\mathcal{F}|^2}{|\mathcal{R}|(|\mathcal{D}| + |\mathcal{F}|)}, \frac{2\epsilon}{1 + \epsilon^2} \frac{|\mathcal{F}||\mathcal{D}|}{|\mathcal{R}|(|\mathcal{D}| + |\mathcal{F}|)} \right\}$  we have that  $x^{\mathcal{D}} \geq x^{DA}$  and that  $y^{\mathcal{D}} \geq y^{DA}$ .*

**Lemma 10.** *For  $\alpha \leq \alpha^{\mathcal{R} > \mathcal{D}} = \min \{ \alpha_x^{\mathcal{R} > \mathcal{D}}, \alpha_y^{\mathcal{R} > \mathcal{D}} \}$  we have that  $x^{\mathcal{R}} \geq x^{\mathcal{D}}$  and that  $y^{\mathcal{R}} \geq y^{\mathcal{D}}$ , with  $\alpha_x^{\mathcal{R} > \mathcal{D}}, \alpha_y^{\mathcal{R} > \mathcal{D}}$ .*

We omit the exact values of  $\alpha_x^{\mathcal{R} > \mathcal{D}}$  and  $\alpha_y^{\mathcal{R} > \mathcal{D}}$ , which can be found in App. H.2 along with the proofs for Lemma 9 and Lemma 10. Since the range of  $\epsilon$  for which  $(x^{\mathcal{R}}, y^{\mathcal{R}}) \geq (x^{\mathcal{D}}, y^{\mathcal{D}}) \geq (x^{DA}, y^{DA})$  cannot be resolved analytically, we show numerically in Fig. 4 that this range is typically large, and broadens as the fraction of samples to be forgotten increases, while the relevant window of correlation strength  $\epsilon$  is wider for smaller correlation.

## 5.2 Low Dimensions: Descent-Ascent Favors The Wrong Solutions

While our previous theoretical analysis demonstrates that DA methods can be harmful to the model, it fails to demonstrate a final concern about these methods, we would like to raise. *Is it possible to remedy the harmful effects of these methods through finetuning on the retain afterwards?*

The answer that we give to this question unfortunately is not always, for neural networks or in general non-convex function classes. To demonstrate this let us consider a binary classification problem using a two dimensional kernel, with labels  $y_i \in \{-1, 1\}$ , data composed of  $\mathbf{x}_i = (x_i, x_i^2)$  and Mean Squared Error (MSE) loss with ridge regularization  $\lambda \in \mathbb{R}^+$ . The network is taken to be a sigmoidal network with two parameters  $\theta = (a, b)$ , such that its output is  $h_{\theta}(\mathbf{x}_i) = \sigma(ax_i + bx_i^2)$ , where  $\sigma(z) = 1/(1 + e^{-(1+z)/2})$ .

We choose 4 samples in the configuration:  $\mathcal{D} = \{\mathbf{x}_1, \mathbf{x}_2, \mathbf{x}_3, \mathbf{x}_4\} = \{(-1, 1), (1, 1), (3, 9), (4, 16)\}$ , with labels  $\{y_1, y_2, y_3, y_4\} = \{-1, 1, -1, 1\}$ , respectively. In order to model the effect of multiple points clustered together, we give each point a different weight in the loss function, such that

$$\mathcal{L} = \frac{1}{|\mathcal{D}|} \sum_{i=1}^{|\mathcal{D}|} \alpha_i \ell_i + \frac{\lambda}{2} \|\theta\|_2^2, \quad (2)$$

where  $\ell_i$  are the single sample loss functions, and  $\{\alpha_1, \alpha_2, \alpha_3, \alpha_4\} = \{5, 4, 1, 4\}$  represent the number of points clustered together, as illustrated in Fig. 5, where  $\lambda = 0.1$ . This means that the effective number of points that the classifier sees is  $\sum_i \alpha_i$ . The data configuration is chosen to



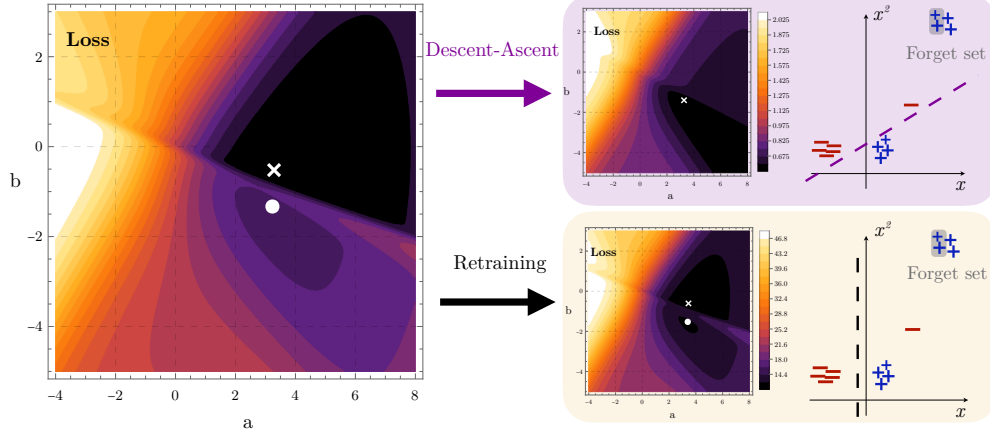

Figure 5: **Unlearning certain forget sets leads to the wrong decision boundary under GDA.** *Left:* We show the MSE loss landscape for a pretrained model on the problem described in Sec. 5.2. We denote as ( $\times$ ) the global minimum, while ( $\circ$ ) is the local minimum. *Right:* The effective loss landscape observed in the GDA problem (top) and the retraining problem (bottom). The combination of these results shows that retraining keeps the model in the same global optimum as the pretrained model, while GDA chooses the local minimum. This is clearly manifest in the decision boundaries favored by the different methods, denoted in dashed lines. Next to the contour plots we present two dimensional illustrations of possible decision boundaries between the samples labeled as negative ( $-$ ) and positive ( $+$ ), while the forget set are the two positive points shaded in gray, as described in Sec. 5.2. We show the decision boundaries for both GDA (right top) and retraining (right bottom).

286 illustrate the failure mode of DA, while the dataset selection is arbitrary the key mode of failure is the  
 287 high correlation between the forget set and a subset of the retain.

288 Suppose we would like to unlearn two of the positive samples positioned at  $\mathbf{x}_4$ . Retraining would  
 289 correspond to simply setting  $\alpha_4 = 2$ , and applying gradient descent. Notice that this provides little  
 290 to no change for the minima location and the contour lines between the original dataset  $\mathcal{D}$  and the  
 291 retraining set  $\mathcal{R}$ . In contrast, Performing GDA would amount to setting  $\alpha_4 = 0$ , since two points will  
 292 contribute the exact opposite gradient as the other two at the same position, effectively erasing them.

293 We find that this example can be simply understood by counting arguments: since the original dataset  
 294 contains effectively 6 negative samples and 8 positive samples, the optimal decision boundary is  
 295 given by the separating plane which correctly classifies the largest number of samples.

296 The pretrained model is optimal when  $\mathbf{x}_1$ ,  $\mathbf{x}_2$  and  $\mathbf{x}_4$  are correctly classified, while mislabeling  $\mathbf{x}_3$   
 297 (13 correct, 1 incorrect). Retraining simply reduces the weight of  $\mathbf{x}_4$ , and keeping the same plane  
 298 is still preferential (11 correct, 1 incorrect). However, performing GDA sets the gradients of half  
 299 of the points at  $\mathbf{x}_4$  to cancel the other half, so it optimal to re-orient the decision boundary so that  
 300 all samples are correctly classified (10 correct, 0 incorrect), while in reality, the algorithm has been  
 301 tricked into finding a suboptimal solution (10 correct, 2 incorrect).

302 The qualitative analysis of this two-dimensional example shows that certain choices of forget sets  
 303 that are highly correlated to the retain can lead to irreversible model degradation when using DA.

## 304 6 Conclusions

305 While our findings highlight significant challenges in current ascent-based unlearning methods, we  
 306 believe that they are instructive for the construction of safer future methods. The weaknesses we  
 307 identify primarily stem from ascent disregarding the data dependencies between the forget and the  
 308 retain set. Future research on ascent based methods should take these dependencies into consideration.  
 309 Our findings also suggests that methods based on rewinding [20] or stochastic methods based on  
 310 noise [44] can be valid alternative schemes when being agnostic on the dataset properties.

## References

- [1] Antonio Ginart, Melody Y. Guan, Gregory Valiant, and James Zou. Making ai forget you: Data deletion in machine learning. In *Proceedings of the 33rd Conference on Neural Information Processing Systems (NeurIPS 2019)*, 2019.
- [2] Yinzhi Cao and Junfeng Yang. Towards making systems forget with machine unlearning. In *2015 IEEE Symposium on Security and Privacy*, pages 463–480, 2015. doi: 10.1109/SP.2015.35.
- [3] Lucas Bourtole, Varun Chandrasekaran, Christopher A. Choquette-Choo, Hengrui Jia, Adelin Travers, Baiwu Zhang, David Lie, and Nicolas Papernot. Machine unlearning, 2020. URL <https://arxiv.org/abs/1912.03817>.
- [4] Martin Pawelczyk, Jimmy Z Di, Yiwei Lu, Gautam Kamath, Ayush Sekhari, and Seth Neel. Machine unlearning fails to remove data poisoning attacks. *arXiv preprint arXiv:2406.17216*, 2024.
- [5] Shashwat Goel, Ameya Prabhu, Philip Torr, Ponnurangam Kumaraguru, and Amartya Sanyal. Corrective machine unlearning, 2024.
- [6] Ken Ziyu Liu. Machine unlearning in 2024, Apr 2024. URL <https://ai.stanford.edu/~kzliu/blog/unlearning>.
- [7] Guangyao Dou, Zheyuan Liu, Qing Lyu, Kaize Ding, and Eric Wong. Avoiding copyright infringement via machine unlearning, 2024.
- [8] George-Octavian Barbulescu and Peter Triantafillou. To each (textual sequence) its own: Improving memorized-data unlearning in large language models, 2024. URL <https://arxiv.org/abs/2405.03097>.
- [9] Nathaniel Li, Alexander Pan, Anjali Gopal, Summer Yue, Daniel Berrios, Alice Gatti, Justin D. Li, Ann-Kathrin Dombrowski, Shashwat Goel, Long Phan, Gabriel Mukobi, Nathan Helm-Burger, Rassin Lababidi, Lennart Justen, Andrew B. Liu, Michael Chen, Isabelle Barrass, Oliver Zhang, Xiaoyuan Zhu, Rishub Tamirisa, Bhargu Bharathi, Adam Khoja, Zhenqi Zhao, Ariel Herbert-Voss, Cort B. Breuer, Samuel Marks, Oam Patel, Andy Zou, Mantas Mazeika, Zifan Wang, Palash Oswal, Weiran Lin, Adam A. Hunt, Justin Tienken-Harder, Kevin Y. Shih, Kemper Talley, John Guan, Russell Kaplan, Ian Steneker, David Campbell, Brad Jokubaitis, Alex Levinson, Jean Wang, William Qian, Kallol Krishna Karmakar, Steven Basart, Stephen Fitz, Mindy Levine, Ponnurangam Kumaraguru, Uday Tupakula, Vijay Varadharajan, Ruoyu Wang, Yan Shoshitaishvili, Jimmy Ba, Kevin M. Esvelt, Alexandr Wang, and Dan Hendrycks. The wmdp benchmark: Measuring and reducing malicious use with unlearning. In *International Conference on Machine Learning (ICML)*, 2024.
- [10] Yuanshun Yao, Xiaojun Xu, and Yang Liu. Large language model unlearning, 2024. URL <https://arxiv.org/abs/2310.10683>.
- [11] Yinzhi Cao and Junfeng Yang. Towards making systems forget with machine unlearning. In *IEEE Symposium on Security and Privacy (SP)*, 2015.
- [12] Seth Neel, Aaron Roth, and Saeed Sharifi-Malvajerdi. Descent-to-delete: Gradient-based methods for machine unlearning. In *Proceedings of the 32nd International Conference on Algorithmic Learning Theory (ALT)*, 2021.
- [13] Laura Graves, Vineel Nagisetty, and Vijay Ganesh. Amnesiac machine learning. In *Proceedings of the AAAI Conference on Artificial Intelligence*, 2021.
- [14] Zachary Izzo, Mary Anne Smart, Kamalika Chaudhuri, and James Zou. Approximate data deletion from machine learning models. In *Proceedings of The 24th International Conference on Artificial Intelligence and Statistics (AISTATS)*, 2021.
- [15] Ananth Mahadevan and Michael Mathioudakis. Certifiable machine unlearning for linear models, 2021.

- [16] Vinith Suriyakumar and Ashia C Wilson. Algorithms that approximate data removal: New results and limitations. *Advances in Neural Information Processing Systems (NeurIPS)*, 2022.
- [17] Chuan Guo, Tom Goldstein, Awni Hannun, and Laurens van der Maaten. Certified data removal from machine learning models, 2023. URL <https://arxiv.org/abs/1911.03030>.
- [18] Lucas Bourtole, Varun Chandrasekaran, Christopher A Choquette-Choo, Hengrui Jia, Adelin Travers, Baiwu Zhang, David Lie, and Nicolas Papernot. Machine unlearning. In *IEEE Symposium on Security and Privacy (SP)*, 2021.
- [19] Xuechen Li, Florian Tramèr, Percy Liang, and Tatsunori Hashimoto. Large language models can be strong differentially private learners. In *International Conference on Learning Representations (ICLR)*, 2022.
- [20] Siqiao Mu and Diego Klabjan. Rewind-to-delete: Certified machine unlearning for nonconvex functions. *arXiv preprint arXiv:2409.09778*, 2024.
- [21] Meghdad Kurmanji, Peter Triantafillou, and Eleni Triantafillou. Towards unbounded machine unlearning. In *Advances in Neural Information Processing Systems (NeurIPS)*, 2024.
- [22] Aditya Golatkar, Alessandro Achille, and Stefano Soatto. Eternal sunshine of the spotless net: Selective forgetting in deep networks. In *Proceedings of the IEEE/CVF Conference on Computer Vision and Pattern Recognition*, pages 9304–9312, 2020.
- [23] Meghdad Kurmanji, Peter Triantafillou, Jamie Hayes, and Eleni Triantafillou. Towards unbounded machine unlearning, 2023. URL <https://arxiv.org/abs/2302.09880>.
- [24] Shashwat Goel, Ameya Prabhu, Amartya Sanyal, Ser-Nam Lim, Philip Torr, and Ponnurangam Kumaraguru. Towards adversarial evaluations for inexact machine unlearning, 2023.
- [25] Jamie Hayes, Ilia Shumailov, Eleni Triantafillou, Amr Khalifa, and Nicolas Papernot. Inexact unlearning needs more careful evaluations to avoid a false sense of privacy, 2024.
- [26] Martin Pawelczyk, Seth Neel, and Himabindu Lakkaraju. In-context unlearning: Language models as few shot unlearners, 2023.
- [27] Yinjun Wu, Edgar Dobriban, and Susan Davidson. Deltagrad: Rapid retraining of machine learning models. In *International Conference on Machine Learning (ICML)*, 2020.
- [28] Shauli Ravfogel, Michael Twiton, Yoav Goldberg, and Ryan D Cotterell. Linear adversarial concept erasure. In *International Conference on Machine Learning (ICML)*, 2022.
- [29] Ronen Eldan and Mark Russinovich. Who’s harry potter? approximate unlearning in llms. *arXiv preprint arXiv:2310.02238*, 2023.
- [30] Nupur Kumari, Bingliang Zhang, Sheng-Yu Wang, Eli Shechtman, Richard Zhang, and Jun-Yan Zhu. Ablating concepts in text-to-image diffusion models. In *IEEE/CVF International Conference on Computer Vision (ICCV)*, 2023.
- [31] Zexuan Zhong, Zhengxuan Wu, Christopher D Manning, Christopher Potts, and Danqi Chen. Mquake: Assessing knowledge editing in language models via multi-hop questions. In *Conference on Empirical Methods in Natural Language Processing (EMNLP)*, 2023.
- [32] Shashwat Goel, Ameya Prabhu, Amartya Sanyal, Ser-Nam Lim, Philip Torr, and Ponnurangam Kumaraguru. Towards adversarial evaluations for inexact machine unlearning. *arXiv preprint arXiv:2201.06640*, 2022.
- [33] Anvith Thudi, Hengrui Jia, Ilia Shumailov, and Nicolas Papernot. On the necessity of auditable algorithmic definitions for machine unlearning. In *USENIX Security Symposium*, 2022.
- [34] Fazl Barez, Tingchen Fu, Ameya Prabhu, Stephen Casper, Amartya Sanyal, Adel Bibi, Aidan O’Gara, Robert Kirk, Ben Bucknall, Tim Fist, Luke Ong, Philip Torr, Kwok-Yan Lam, Robert Trager, David Krueger, Sören Mindermann, José Hernandez-Orallo, Mor Geva, and Yarin Gal. Open problems in machine unlearning for ai safety, 2025. URL <https://arxiv.org/abs/2501.04952>.

- 405 [35] Jinghan Jia, Jiancheng Liu, Parikshit Ram, Yuguang Yao, Gaowen Liu, Yang Liu, Pranay  
406 Sharma, and Sijia Liu. Model sparsity can simplify machine unlearning, 2024. URL <https://arxiv.org/abs/2304.04934>.  
407
- 408 [36] Guihong Li, Hsiang Hsu, Chun-Fu Chen, and Radu Marculescu. Fast-ntk: Parameter-efficient  
409 unlearning for large-scale models. In *Proceedings of the IEEE/CVF Conference on Computer*  
410 *Vision and Pattern Recognition*, pages 227–234, 2024.
- 411 [37] Alexander Warnecke, Lukas Pirch, Christian Wressnegger, and Konrad Rieck. Machine un-  
412 learning of features and labels. *arXiv preprint arXiv:2108.11577*, 2021.
- 413 [38] Kristian Georgiev, Roy Rinberg, Sung Min Park, Shivam Garg, Andrew Ilyas, Aleksander  
414 Madry, and Seth Neel. Attribute-to-delete: Machine unlearning via datamodel matching, 2024.  
415 URL <https://arxiv.org/abs/2410.23232>.
- 416 [39] Alex Krizhevsky. Learning multiple layers of features from tiny images. Technical report, 2009.
- 417 [40] Kaiming He, Xiangyu Zhang, Shaoqing Ren, and Jian Sun. Deep residual learning for image  
418 recognition. *CoRR*, abs/1512.03385, 2015. URL <http://arxiv.org/abs/1512.03385>.
- 419 [41] Jia Deng, Wei Dong, Richard Socher, Li-Jia Li, Kai Li, and Li Fei-Fei. Imagenet: A large-  
420 scale hierarchical image database. In *2009 IEEE conference on computer vision and pattern*  
421 *recognition*, pages 248–255. Ieee, 2009.
- 422 [42] Shibani Santurkar, Dimitris Tsipras, and Aleksander Madry. Breeds: Benchmarks for subpopu-  
423 lation shift. In *International Conference on Learning Representations (ICLR)*, 2021.
- 424 [43] Daniel Soudry, Elad Hoffer, Mor Shpigel Nacson, Suriya Gunasekar, and Nathan Srebro. The  
425 implicit bias of gradient descent on separable data, 2024. URL [https://arxiv.org/abs/](https://arxiv.org/abs/1710.10345)  
426 [1710.10345](https://arxiv.org/abs/1710.10345).
- 427 [44] Eli Chien, Haoyu Wang, Ziang Chen, and Pan Li. Langevin unlearning: A new perspective of  
428 noisy gradient descent for machine unlearning. *arXiv preprint arXiv:2401.10371*, 2024.

## NeurIPS Paper Checklist

### 1. Claims

Question: Do the main claims made in the abstract and introduction accurately reflect the paper's contributions and scope?

Answer: [\[Yes\]](#)

Justification: All of the main claims presented in the introduction and the abstract have a separate section where they are discussed and shown in the main and supporting more extensive sections in the appendix.

Guidelines:

- The answer NA means that the abstract and introduction do not include the claims made in the paper.
- The abstract and/or introduction should clearly state the claims made, including the contributions made in the paper and important assumptions and limitations. A No or NA answer to this question will not be perceived well by the reviewers.
- The claims made should match theoretical and experimental results, and reflect how much the results can be expected to generalize to other settings.
- It is fine to include aspirational goals as motivation as long as it is clear that these goals are not attained by the paper.

### 2. Limitations

Question: Does the paper discuss the limitations of the work performed by the authors?

Answer: [\[Yes\]](#)

Justification: There is a dedicated section on the appendix that discusses the limitations, namely Appendix A, due to the lack of space on the main part.

Guidelines:

- The answer NA means that the paper has no limitation while the answer No means that the paper has limitations, but those are not discussed in the paper.
- The authors are encouraged to create a separate "Limitations" section in their paper.
- The paper should point out any strong assumptions and how robust the results are to violations of these assumptions (e.g., independence assumptions, noiseless settings, model well-specification, asymptotic approximations only holding locally). The authors should reflect on how these assumptions might be violated in practice and what the implications would be.
- The authors should reflect on the scope of the claims made, e.g., if the approach was only tested on a few datasets or with a few runs. In general, empirical results often depend on implicit assumptions, which should be articulated.
- The authors should reflect on the factors that influence the performance of the approach. For example, a facial recognition algorithm may perform poorly when image resolution is low or images are taken in low lighting. Or a speech-to-text system might not be used reliably to provide closed captions for online lectures because it fails to handle technical jargon.
- The authors should discuss the computational efficiency of the proposed algorithms and how they scale with dataset size.
- If applicable, the authors should discuss possible limitations of their approach to address problems of privacy and fairness.
- While the authors might fear that complete honesty about limitations might be used by reviewers as grounds for rejection, a worse outcome might be that reviewers discover limitations that aren't acknowledged in the paper. The authors should use their best judgment and recognize that individual actions in favor of transparency play an important role in developing norms that preserve the integrity of the community. Reviewers will be specifically instructed to not penalize honesty concerning limitations.

### 3. Theory assumptions and proofs

Question: For each theoretical result, does the paper provide the full set of assumptions and a complete (and correct) proof?

Answer: [Yes]

Justification: All of the assumptions for the theoretical results are clearly stated before presenting them in the main part and their proofs are in the respective section of the appendix.

Guidelines:

- The answer NA means that the paper does not include theoretical results.
- All the theorems, formulas, and proofs in the paper should be numbered and cross-referenced.
- All assumptions should be clearly stated or referenced in the statement of any theorems.
- The proofs can either appear in the main paper or the supplemental material, but if they appear in the supplemental material, the authors are encouraged to provide a short proof sketch to provide intuition.
- Inversely, any informal proof provided in the core of the paper should be complemented by formal proofs provided in appendix or supplemental material.
- Theorems and Lemmas that the proof relies upon should be properly referenced.

#### 4. Experimental result reproducibility

Question: Does the paper fully disclose all the information needed to reproduce the main experimental results of the paper to the extent that it affects the main claims and/or conclusions of the paper (regardless of whether the code and data are provided or not)?

Answer: [Yes]

Justification: We include the experimental details in the corresponding section of the appendix, along with the zip file of the code that contains a readme for reproducibility purposes.

Guidelines:

- The answer NA means that the paper does not include experiments.
- If the paper includes experiments, a No answer to this question will not be perceived well by the reviewers: Making the paper reproducible is important, regardless of whether the code and data are provided or not.
- If the contribution is a dataset and/or model, the authors should describe the steps taken to make their results reproducible or verifiable.
- Depending on the contribution, reproducibility can be accomplished in various ways. For example, if the contribution is a novel architecture, describing the architecture fully might suffice, or if the contribution is a specific model and empirical evaluation, it may be necessary to either make it possible for others to replicate the model with the same dataset, or provide access to the model. In general, releasing code and data is often one good way to accomplish this, but reproducibility can also be provided via detailed instructions for how to replicate the results, access to a hosted model (e.g., in the case of a large language model), releasing of a model checkpoint, or other means that are appropriate to the research performed.
- While NeurIPS does not require releasing code, the conference does require all submissions to provide some reasonable avenue for reproducibility, which may depend on the nature of the contribution. For example
  - (a) If the contribution is primarily a new algorithm, the paper should make it clear how to reproduce that algorithm.
  - (b) If the contribution is primarily a new model architecture, the paper should describe the architecture clearly and fully.
  - (c) If the contribution is a new model (e.g., a large language model), then there should either be a way to access this model for reproducing the results or a way to reproduce the model (e.g., with an open-source dataset or instructions for how to construct the dataset).
  - (d) We recognize that reproducibility may be tricky in some cases, in which case authors are welcome to describe the particular way they provide for reproducibility. In the case of closed-source models, it may be that access to the model is limited in some way (e.g., to registered users), but it should be possible for other researchers to have some path to reproducing or verifying the results.

## 5. Open access to data and code

Question: Does the paper provide open access to the data and code, with sufficient instructions to faithfully reproduce the main experimental results, as described in supplemental material?

Answer: [Yes]

Justification: We included the code along with instructions for its reproducibility. All the datasets are licensed for non-commercial research and educational purposes, which we reference in the paper.

Guidelines:

- The answer NA means that paper does not include experiments requiring code.
- Please see the NeurIPS code and data submission guidelines (<https://nips.cc/public/guides/CodeSubmissionPolicy>) for more details.
- While we encourage the release of code and data, we understand that this might not be possible, so “No” is an acceptable answer. Papers cannot be rejected simply for not including code, unless this is central to the contribution (e.g., for a new open-source benchmark).
- The instructions should contain the exact command and environment needed to run to reproduce the results. See the NeurIPS code and data submission guidelines (<https://nips.cc/public/guides/CodeSubmissionPolicy>) for more details.
- The authors should provide instructions on data access and preparation, including how to access the raw data, preprocessed data, intermediate data, and generated data, etc.
- The authors should provide scripts to reproduce all experimental results for the new proposed method and baselines. If only a subset of experiments are reproducible, they should state which ones are omitted from the script and why.
- At submission time, to preserve anonymity, the authors should release anonymized versions (if applicable).
- Providing as much information as possible in supplemental material (appended to the paper) is recommended, but including URLs to data and code is permitted.

## 6. Experimental setting/details

Question: Does the paper specify all the training and test details (e.g., data splits, hyper-parameters, how they were chosen, type of optimizer, etc.) necessary to understand the results?

Answer: [Yes]

Justification: In the corresponding section of the appendix there is an extensive description of the details for the experiments.

Guidelines:

- The answer NA means that the paper does not include experiments.
- The experimental setting should be presented in the core of the paper to a level of detail that is necessary to appreciate the results and make sense of them.
- The full details can be provided either with the code, in appendix, or as supplemental material.

## 7. Experiment statistical significance

Question: Does the paper report error bars suitably and correctly defined or other appropriate information about the statistical significance of the experiments?

Answer: [Yes]

Justification: We discuss the statistical significance of the experiments on the appendix. We utilize previously established methodology for aggregation of the results in the main body.

Guidelines:

- The answer NA means that the paper does not include experiments.
- The authors should answer "Yes" if the results are accompanied by error bars, confidence intervals, or statistical significance tests, at least for the experiments that support the main claims of the paper.

- The factors of variability that the error bars are capturing should be clearly stated (for example, train/test split, initialization, random drawing of some parameter, or overall run with given experimental conditions).
- The method for calculating the error bars should be explained (closed form formula, call to a library function, bootstrap, etc.)
- The assumptions made should be given (e.g., Normally distributed errors).
- It should be clear whether the error bar is the standard deviation or the standard error of the mean.
- It is OK to report 1-sigma error bars, but one should state it. The authors should preferably report a 2-sigma error bar than state that they have a 96% CI, if the hypothesis of Normality of errors is not verified.
- For asymmetric distributions, the authors should be careful not to show in tables or figures symmetric error bars that would yield results that are out of range (e.g. negative error rates).
- If error bars are reported in tables or plots, The authors should explain in the text how they were calculated and reference the corresponding figures or tables in the text.

## 8. Experiments compute resources

Question: For each experiment, does the paper provide sufficient information on the computer resources (type of compute workers, memory, time of execution) needed to reproduce the experiments?

Answer: [Yes]

Justification: We provide the relevant information in the experimental section of the appendix.

Guidelines:

- The answer NA means that the paper does not include experiments.
- The paper should indicate the type of compute workers CPU or GPU, internal cluster, or cloud provider, including relevant memory and storage.
- The paper should provide the amount of compute required for each of the individual experimental runs as well as estimate the total compute.
- The paper should disclose whether the full research project required more compute than the experiments reported in the paper (e.g., preliminary or failed experiments that didn't make it into the paper).

## 9. Code of ethics

Question: Does the research conducted in the paper conform, in every respect, with the NeurIPS Code of Ethics <https://neurips.cc/public/EthicsGuidelines>?

Answer: [Yes]

Justification: We have read the code of ethics and complied with all of each requirements, such as anonymity.

Guidelines:

- The answer NA means that the authors have not reviewed the NeurIPS Code of Ethics.
- If the authors answer No, they should explain the special circumstances that require a deviation from the Code of Ethics.
- The authors should make sure to preserve anonymity (e.g., if there is a special consideration due to laws or regulations in their jurisdiction).

## 10. Broader impacts

Question: Does the paper discuss both potential positive societal impacts and negative societal impacts of the work performed?

Answer: [Yes]

Justification: We discuss on a section on the Appendix the potential social implications of our work.

Guidelines:



- The answer NA means that there is no societal impact of the work performed.
- If the authors answer NA or No, they should explain why their work has no societal impact or why the paper does not address societal impact.
- Examples of negative societal impacts include potential malicious or unintended uses (e.g., disinformation, generating fake profiles, surveillance), fairness considerations (e.g., deployment of technologies that could make decisions that unfairly impact specific groups), privacy considerations, and security considerations.
- The conference expects that many papers will be foundational research and not tied to particular applications, let alone deployments. However, if there is a direct path to any negative applications, the authors should point it out. For example, it is legitimate to point out that an improvement in the quality of generative models could be used to generate deepfakes for disinformation. On the other hand, it is not needed to point out that a generic algorithm for optimizing neural networks could enable people to train models that generate Deepfakes faster.
- The authors should consider possible harms that could arise when the technology is being used as intended and functioning correctly, harms that could arise when the technology is being used as intended but gives incorrect results, and harms following from (intentional or unintentional) misuse of the technology.
- If there are negative societal impacts, the authors could also discuss possible mitigation strategies (e.g., gated release of models, providing defenses in addition to attacks, mechanisms for monitoring misuse, mechanisms to monitor how a system learns from feedback over time, improving the efficiency and accessibility of ML).

## 11. Safeguards

Question: Does the paper describe safeguards that have been put in place for responsible release of data or models that have a high risk for misuse (e.g., pretrained language models, image generators, or scraped datasets)?

Answer: [NA]

Justification: The models and datasets used in the paper are standard in general machine learning and don't pose such risks.

Guidelines:

- The answer NA means that the paper poses no such risks.
- Released models that have a high risk for misuse or dual-use should be released with necessary safeguards to allow for controlled use of the model, for example by requiring that users adhere to usage guidelines or restrictions to access the model or implementing safety filters.
- Datasets that have been scraped from the Internet could pose safety risks. The authors should describe how they avoided releasing unsafe images.
- We recognize that providing effective safeguards is challenging, and many papers do not require this, but we encourage authors to take this into account and make a best faith effort.

## 12. Licenses for existing assets

Question: Are the creators or original owners of assets (e.g., code, data, models), used in the paper, properly credited and are the license and terms of use explicitly mentioned and properly respected?

Answer: [Yes]

Justification: All of the models and datasets are licensed for non-commercial research and educational purposes and the original creators of the assets are properly credited and acknowledged.

Guidelines:

- The answer NA means that the paper does not use existing assets.
- The authors should cite the original paper that produced the code package or dataset.
- The authors should state which version of the asset is used and, if possible, include a URL.

- The name of the license (e.g., CC-BY 4.0) should be included for each asset.
- For scraped data from a particular source (e.g., website), the copyright and terms of service of that source should be provided.
- If assets are released, the license, copyright information, and terms of use in the package should be provided. For popular datasets, [paperswithcode.com/datasets](https://paperswithcode.com/datasets) has curated licenses for some datasets. Their licensing guide can help determine the license of a dataset.
- For existing datasets that are re-packaged, both the original license and the license of the derived asset (if it has changed) should be provided.
- If this information is not available online, the authors are encouraged to reach out to the asset's creators.

### 13. New assets

Question: Are new assets introduced in the paper well documented and is the documentation provided alongside the assets?

Answer: [\[Yes\]](#)

Justification: The does not release new data or model assets. The code is included, documented and anonymized.

Guidelines:

- The answer NA means that the paper does not release new assets.
- Researchers should communicate the details of the dataset/code/model as part of their submissions via structured templates. This includes details about training, license, limitations, etc.
- The paper should discuss whether and how consent was obtained from people whose asset is used.
- At submission time, remember to anonymize your assets (if applicable). You can either create an anonymized URL or include an anonymized zip file.

### 14. Crowdsourcing and research with human subjects

Question: For crowdsourcing experiments and research with human subjects, does the paper include the full text of instructions given to participants and screenshots, if applicable, as well as details about compensation (if any)?

Answer: [\[NA\]](#)

Justification: The paper does not involve crowdsourcing nor research with human subjects.

Guidelines:

- The answer NA means that the paper does not involve crowdsourcing nor research with human subjects.
- Including this information in the supplemental material is fine, but if the main contribution of the paper involves human subjects, then as much detail as possible should be included in the main paper.
- According to the NeurIPS Code of Ethics, workers involved in data collection, curation, or other labor should be paid at least the minimum wage in the country of the data collector.

### 15. Institutional review board (IRB) approvals or equivalent for research with human subjects

Question: Does the paper describe potential risks incurred by study participants, whether such risks were disclosed to the subjects, and whether Institutional Review Board (IRB) approvals (or an equivalent approval/review based on the requirements of your country or institution) were obtained?

Answer: [\[NA\]](#)

Justification: The paper does not involve crowdsourcing nor research with human subjects.

Guidelines:

- The answer NA means that the paper does not involve crowdsourcing nor research with human subjects.

- 745 • Depending on the country in which research is conducted, IRB approval (or equivalent)  
746 may be required for any human subjects research. If you obtained IRB approval, you  
747 should clearly state this in the paper.
- 748 • We recognize that the procedures for this may vary significantly between institutions  
749 and locations, and we expect authors to adhere to the NeurIPS Code of Ethics and the  
750 guidelines for their institution.
- 751 • For initial submissions, do not include any information that would break anonymity (if  
752 applicable), such as the institution conducting the review.

#### 753 16. **Declaration of LLM usage**

754 Question: Does the paper describe the usage of LLMs if it is an important, original, or  
755 non-standard component of the core methods in this research? Note that if the LLM is used  
756 only for writing, editing, or formatting purposes and does not impact the core methodology,  
757 scientific rigorousness, or originality of the research, declaration is not required.

758 Answer: [NA]

759 Justification: The core method development in this research does not involve LLMs as any  
760 important, original, or non-standard components.

761 Guidelines:

- 762 • The answer NA means that the core method development in this research does not  
763 involve LLMs as any important, original, or non-standard components.
- 764 • Please refer to our LLM policy (<https://neurips.cc/Conferences/2025/LLM>)  
765 for what should or should not be described.

## A Limitations

**Limitations:** A key limitation in our theoretical results is their simplicity, both in the model analyzed as well as the methods, for which the analysis is done. Therefore the proof does not explicitly prohibit more complex models or methods from resolving this issue. We believe, however, that as far as models go simpler models could be nested in more complex ones, leading to this detrimental phenomenon. For developing more complex methods based on ascent we believe that still someone has to take correlations into consideration, given our findings.

## B Proof of Lemma for Random Sets

In this section we provide proof that for a forget set, selected uniformly at random from the dataset it is with high probability impossible to differentiate the accuracy, loss, or any other metric between the test and the forget set, given that both of them are large enough. In this section we provide the proof for the accuracy metric, but for other metrics the proof follows in like manner. Intuitively this stems from the fact that for a model which has "unlearned" a forget set, that set is a random set for it.

We will use the following notation. Let  $\mathbb{1}_{(\cdot, \cdot)} : \mathbb{R} \times \mathbb{R} \rightarrow \{0, 1\}$  such that  $\mathbb{1}_{(x, x)} = 1$ , otherwise for  $x \neq y$ ,  $\mathbb{1}_{(x, y)} = 0$ . We will denote our model with parameters  $\theta$  as  $h_\theta : \mathbb{R}^d \rightarrow \mathbb{R}$ .

**Lemma 1** (Random Sets). *Given a true distribution of samples  $P_{\mathcal{T}}$  and a forget set  $\mathcal{F}$  chosen uniformly at random from the dataset and a model with parameters  $\theta$ , then the probability that the accuracy on the test set  $\text{Acc}_{\mathcal{T}}$  and the forget set  $\text{Acc}_{\mathcal{F}}$  diverge from one another by more than  $\epsilon$  is upperbounded by the following inequality:*

$$P(|\text{Acc}_{\mathcal{T}} - \text{Acc}_{\mathcal{F}}| \geq \epsilon) \leq 2 \exp(-2|\mathcal{F}|\epsilon^2).$$

*Proof.* For each sample  $(x_i, y_i)$ , we calculate the correct response on that sample, as  $\mathbb{1}_{(h_\theta(x_i), y_i)}$ , consequently the response of the model for any sample is an independent random variable. So we get the following random variables, which correspond to the accuracy of the model on the forget set  $\mathcal{F}$  and the test set  $\mathcal{T}$  respectively.

$$\begin{aligned} \text{Acc}_{\mathcal{T}} &= \mathbb{E}_{(x_i, y_i) \sim P_{\mathcal{T}}} [\mathbb{1}_{(h_\theta(x_i), y_i)}] \\ \text{Acc}_{\mathcal{F}} &= \frac{1}{|\mathcal{F}|} \sum_{(x_i, y_i) \in \mathcal{F}} \mathbb{1}_{(h_\theta(x_i), y_i)} \end{aligned}$$

In order to proceed we will utilize Hoeffding's Inequality, which we state below for completeness:

**Lemma 11.** *Let  $Z_1, Z_2, \dots, Z_n$  be independent random variables such that  $Z_i \in [a_i, b_i]$ . Define their sum as:*

$$S_n = \sum_{i=1}^n Z_i$$

and let  $\mathbb{E}[S_n]$  be the expected value of  $S_n$ . Then, for any  $t > 0$ , the following bound holds:

$$P(|S_n - \mathbb{E}[S_n]| \geq nt) \leq 2 \exp\left(\frac{-2n^2 t^2}{\sum_{i=1}^n (b_i - a_i)^2}\right)$$

In our case we have that  $\frac{1}{n} S_n = \text{Acc}_{\mathcal{F}}$ . Since the Forget set  $\mathcal{F}$  is selected uniformly at random, we have that:

$$\begin{aligned} \mathbb{E}[\text{Acc}_{\mathcal{F}}] &= \mathbb{E}\left[\frac{1}{|\mathcal{F}|} \sum_{(x_i, y_i) \in \mathcal{F}} \mathbb{1}_{(h_\theta(x_i), y_i)}\right] \\ &= \frac{1}{|\mathcal{F}|} \sum_{(x_i, y_i) \in \mathcal{F}} \mathbb{E}_{(x_i, y_i) \sim P_{\mathcal{T}}} [\mathbb{1}_{(h_\theta(x_i), y_i)}] \\ &= \mathbb{E}_{(x_i, y_i) \sim P_{\mathcal{T}}} [\mathbb{1}_{(h_\theta(x_i), y_i)}] \\ &= \text{Acc}_{\mathcal{T}} \end{aligned}$$

796 Since the random variables  $\mathbb{1}_{(h_\theta(x_i), y_i)} \in [0, 1]$ , we have that:

$$P(|\text{Acc}_{\mathcal{T}} - \text{Acc}_{\mathcal{F}}| \geq \epsilon) \leq 2\exp(-2|\mathcal{F}|\epsilon^2)$$

797 which gives the lemma statement.  $\square$

798 The above lemma gives a formal statement, as to why maximizing the error on random forget sets  
799 does not correspond to true unlearning, since the metrics in the forget set should match those in the  
800 test set.

## 801 C Logistic Regression

### 802 C.1 Problem Statement

803 The logistic regression problem for the full dataset  $\mathcal{D}$ , retain set  $\mathcal{R}$  and for the Descent-Ascent  
804 algorithm can be restated as:

$$\begin{aligned} \text{minimization } \mathcal{D} : & \frac{1}{|\mathcal{D}|} \sum_{i=1}^{\mathcal{D}} e^{-y_i \cdot \langle w, x_i \rangle} + \frac{\lambda}{2} \|w\|_2^2 \\ \text{minimization } \mathcal{R} : & \frac{1}{|\mathcal{R}|} \sum_{i=1}^{\mathcal{R}} e^{-y_i \cdot \langle w, x_i \rangle} + \frac{\lambda}{2} \|w\|_2^2 \\ \text{Descent } \mathcal{R} - \text{Ascent } \mathcal{F} : & \frac{1}{|\mathcal{R}|} \sum_{i=1}^{\mathcal{R}} e^{-y_i \cdot \langle w, x_i \rangle} - \frac{1}{|\mathcal{F}|} \sum_{i=1}^{\mathcal{F}} e^{-y_i \cdot \langle w, x_i \rangle} + \frac{\lambda}{2} \|w\|_2^2 \end{aligned} \quad (3)$$

### 805 C.2 Single Dimension

806 In this section, we compare the solutions of training a logistic regression model on a full dataset  $\mathcal{D}$ ,  
807 purely on the retain set  $\mathcal{R}$  and doing GDA on the forget set  $\mathcal{F}$ . We will also include a regularization  
808 term. The corresponding objective functions would be:

809 We can derivate the above to get the following equations for their solutions respectively.

$$\begin{aligned} (\text{minimization } \mathcal{D}) \quad & \frac{1}{|\mathcal{D}|} \sum_{i=1}^{\mathcal{D}} -y_i \cdot x_i e^{-y_i \cdot \langle w, x_i \rangle} + \lambda w = 0 \\ (\text{minimization } \mathcal{R}) \quad & \frac{1}{|\mathcal{R}|} \sum_{i=1}^{\mathcal{R}} -y_i \cdot x_i e^{-y_i \cdot \langle w, x_i \rangle} + \lambda w = 0 \\ (\text{Descent } \mathcal{R} - \text{Ascent } \mathcal{F}) \quad & \frac{1}{|\mathcal{R}|} \sum_{i=1}^{\mathcal{R}} -y_i \cdot x_i e^{-y_i \cdot \langle w, x_i \rangle} - \frac{1}{|\mathcal{F}|} \sum_{i=1}^{\mathcal{F}} -y_i \cdot x_i e^{-y_i \cdot \langle w, x_i \rangle} + \lambda w = 0 \end{aligned}$$

810 So we can express each coordinate  $j$  of the minimizer for the three cases, as:

$$\begin{aligned} (\text{minimization } \mathcal{D}) \quad & w_j = \frac{1}{\lambda |\mathcal{D}|} \left( \sum_{i=1}^{\mathcal{D}} y_i \cdot x_{i,j} e^{-y_i \cdot \langle w, x_i \rangle} \right) \\ (\text{minimization } \mathcal{R}) \quad & w_j = \frac{1}{\lambda |\mathcal{R}|} \left( \sum_{i=1}^{\mathcal{R}} y_i \cdot x_{i,j} e^{-y_i \cdot \langle w, x_i \rangle} \right) \\ (\text{Descent } \mathcal{R} - \text{Ascent } \mathcal{F}) \quad & w_j = \frac{1}{\lambda |\mathcal{R}|} \left( \sum_{i=1}^{\mathcal{R}} y_i \cdot x_{i,j} e^{-y_i \cdot \langle w, x_i \rangle} \right) - \frac{1}{\lambda |\mathcal{F}|} \left( \sum_{i=1}^{\mathcal{F}} y_i \cdot x_{i,j} e^{-y_i \cdot \langle w, x_i \rangle} \right) \end{aligned}$$

### 811 C.3 Iterating Gradient Descent and Ascent

812 Here, we consider the iterative gradient descent-ascent algorithm, where we first perform a gradient  
813 descent step on the retain set, followed by a gradient ascent step on the forget set. We show that to  
814 leading order in the small learning rate expansion, the solution found by iterative GA is identical to

815 the one given by GA in Eq. (3). For iterative GA, the dynamics are given by

$$w_j^{t+1} = w_j^t + \eta \left( \frac{|\mathcal{R}_j|}{|\mathcal{R}|} e^{-w_j^t} - \lambda w_j^t \right), \quad (4)$$

$$w_j^{t+2} = w_j^{t+1} - \eta \left( \frac{\epsilon \cdot |\mathcal{R}_j|}{|\mathcal{F}|} e^{-w_j^{t+1}} + \lambda w_j^{t+1} \right),$$

816 where  $\eta$  is the learning rate for both steps. Plugging in the result of  $w_j^{t+1}$  into the expression for  
817  $w_j^{t+2}$  and expanding for small  $\eta \ll 1$ , we obtain the following update rule

$$\begin{aligned} w_j^{t+2} &= w_j^t + \eta \left( \frac{|\mathcal{R}_j|}{|\mathcal{R}|} e^{-w_j^t} - \lambda w_j^t \right) \\ &\quad - \eta \left( \frac{\epsilon \cdot |\mathcal{R}_j|}{|\mathcal{F}|} e^{-\left(w_j^t + \eta \left( \frac{|\mathcal{R}_j|}{|\mathcal{R}|} e^{-w_j^t} - \lambda w_j^t \right)\right)} + \lambda \left( w_j^t + \eta \left( \frac{|\mathcal{R}_j|}{|\mathcal{R}|} e^{-w_j^t} - \lambda w_j^t \right) \right) \right) \\ &\simeq w_j^t + \eta \left( \frac{|\mathcal{R}_j|}{|\mathcal{R}|} e^{-w_j^t} - 2\lambda w_j^t \right) - \eta \left( \frac{\epsilon \cdot |\mathcal{R}_j|}{|\mathcal{F}|} e^{-\left(w_j^t + \eta \left( \frac{|\mathcal{R}_j|}{|\mathcal{R}|} e^{-w_j^t} - \lambda w_j^t \right)\right)} \right) \\ &\simeq w_j^t + \eta \left( \frac{|\mathcal{R}_j|}{|\mathcal{R}|} e^{-w_j^t} - 2\lambda w_j^t \right) - \eta \left( \frac{\epsilon \cdot |\mathcal{R}_j|}{|\mathcal{F}|} e^{-w_j^t} \left( 1 - \eta \left( \frac{|\mathcal{R}_j|}{|\mathcal{R}|} e^{-w_j^t} - \lambda w_j^t \right) \right) \right) \\ &= w_j^t - \eta \left( -\frac{|\mathcal{R}_j|}{|\mathcal{R}|} e^{-w_j^t} + \frac{\epsilon \cdot |\mathcal{R}_j|}{|\mathcal{F}|} e^{-w_j^t} + 2\lambda w_j^t \right) + \mathcal{O}(\eta^2). \end{aligned} \quad (5)$$

818 Eq. (5) shows that up to order  $\mathcal{O}(\eta^2)$ , the dynamics, as well as the convergent solution of the iterative  
819 descent-ascent algorithm are identical to the ones obtained from Eq. (3), up to a rescaling of the  
820 regularization parameter by a factor of 2, as in  $\lambda_{\text{DA}} = 2\lambda_{\text{Iter-DA}}$ .

## 821 D Proof of Lemma 2

822 In this section we prove Lemma 2 under Assumption 1 and Assumption 2.

823 **Lemma 2** (Closed Form). *Let  $w_j^{\mathcal{D}}$ ,  $w_j^{\mathcal{R}}$  and  $w_j^{\text{DA}}$  be the  $j^{\text{th}}$  coordinate of **any** local minima/maxima  
824 for the logistic regression problems defined in Eq. (1), then they admit the form:*

$$w_j^{\mathcal{D}} = W \left( \frac{(1 + \alpha)|\mathcal{R}_j|}{\lambda|\mathcal{D}|} \right), w_j^{\mathcal{R}} = W \left( \frac{|\mathcal{R}_j|}{\lambda|\mathcal{R}|} \right), w_j^{\text{DA}} = W \left( \frac{(1 - \alpha|\mathcal{R}|/|\mathcal{F}|)|\mathcal{R}_j|}{\lambda|\mathcal{R}|} \right),$$

825 where  $W(z)$  corresponds to the Lambert-W function, the solution to  $z = W(z)e^{W(z)}$ .

826 *Proof.* Let us start by restating the original problem as given in Eq. (3). For the sake of completeness.

$$\text{minimization } \mathcal{D} : \frac{1}{|\mathcal{D}|} \sum_{i=1}^{\mathcal{D}} e^{-y_i \cdot \langle w, x_i \rangle} + \frac{\lambda}{2} \|w\|_2^2$$

$$\text{minimization } \mathcal{R} : \frac{1}{|\mathcal{R}|} \sum_{i=1}^{\mathcal{R}} e^{-y_i \cdot \langle w, x_i \rangle} + \frac{\lambda}{2} \|w\|_2^2$$

$$\text{Descent } \mathcal{R} - \text{Ascent } \mathcal{F} : \frac{1}{|\mathcal{R}|} \sum_{i=1}^{\mathcal{R}} e^{-y_i \cdot \langle w, x_i \rangle} - \frac{1}{|\mathcal{F}|} \sum_{i=1}^{\mathcal{F}} e^{-y_i \cdot \langle w, x_i \rangle} + \frac{\lambda}{2} \|w\|_2^2$$

827 We can get the local minima of these functions by using Fermat's theorem, therefore we have:

$$\text{minimization } \mathcal{D} : \frac{1}{|\mathcal{D}|} \sum_{i=1}^{\mathcal{D}} -y_i \cdot x_i e^{-y_i \cdot \langle w, x_i \rangle} + \lambda w = 0$$

$$\text{minimization } \mathcal{R} : \frac{1}{|\mathcal{R}|} \sum_{i=1}^{\mathcal{R}} -y_i \cdot x_i e^{-y_i \cdot \langle w, x_i \rangle} + \lambda w = 0$$

$$\text{Descent } \mathcal{R} - \text{Ascent } \mathcal{F} : \frac{1}{|\mathcal{R}|} \sum_{i=1}^{\mathcal{R}} -y_i \cdot x_i e^{-y_i \cdot \langle w, x_i \rangle} - \frac{1}{|\mathcal{F}|} \sum_{i=1}^{\mathcal{F}} -y_i \cdot x_i e^{-y_i \cdot \langle w, x_i \rangle} + \lambda w = 0$$

828 Solving the equations for coordinate  $j$  and using Assumption 1, we get:

$$\text{minimization } \mathcal{D} : w_j = \frac{1}{\lambda|\mathcal{D}|} \left( \sum_{i=1}^{S_j} y_i \cdot x_{i,j} e^{-y_i \cdot w_j \cdot x_{i,j}} \right)$$

$$\text{minimization } \mathcal{R} : w_j = \frac{1}{\lambda|\mathcal{R}|} \left( \sum_{i=1}^{\mathcal{R}_j} y_i \cdot x_{i,j} e^{-y_i \cdot w_j \cdot x_{i,j}} \right)$$

$$\text{Descent } \mathcal{R} - \text{Ascent } \mathcal{F} : w_j = \frac{1}{\lambda|\mathcal{R}|} \left( \sum_{i=1}^{\mathcal{R}_j} y_i \cdot x_{i,j} e^{-y_i \cdot w_j \cdot x_{i,j}} \right) - \frac{1}{\lambda|\mathcal{F}|} \left( \sum_{i=1}^{\mathcal{F}_j} y_i \cdot x_{i,j} e^{-y_i \cdot w_j \cdot x_{i,j}} \right)$$

829 Now we can utilize Assumption 2 and the fact that:  $|\mathcal{F}_j| = \alpha \cdot |\mathcal{R}_j|$  to restate the previous equations  
830 in the form:

$$\text{minimization } \mathcal{D} : w_j = \frac{(1 + \alpha)|\mathcal{R}_j|}{\lambda|\mathcal{D}|} e^{-w_j}$$

$$\text{minimization } \mathcal{R} : w_j = \frac{|\mathcal{R}_j|}{\lambda|\mathcal{R}|} e^{-w_j}$$

$$\text{Descent } \mathcal{R} - \text{Ascent } \mathcal{F} : w_j = \frac{|\mathcal{R}_j|}{\lambda|\mathcal{R}|} e^{-w_j} - \frac{\alpha \cdot |\mathcal{R}_j|}{\lambda|\mathcal{F}|} e^{-w_j}$$

831 As explained in App. D.1 the Lambert function  $W$  provides the solution for equations of the previous  
832 form. Using this fact we get:

$$\text{minimization } \mathcal{D} : w_j^{\mathcal{D}} = W \left( \frac{(1 + \alpha)|\mathcal{R}_j|}{\lambda|\mathcal{D}|} \right)$$

$$\text{minimization } \mathcal{R} : w_j^{\mathcal{R}} = W \left( \frac{|\mathcal{R}_j|}{\lambda|\mathcal{R}|} \right)$$

$$\text{Descent } \mathcal{R} - \text{Ascent } \mathcal{F} : w_j^{\text{DA}} = W \left( \frac{(1 - \alpha|\mathcal{R}|/|\mathcal{F}|)|\mathcal{R}_j|}{\lambda|\mathcal{R}|} \right)$$

833 This concludes the proof. □

## 834 D.1 The Lambert function $W$

835 In this section for the sake of exposition we briefly discuss the Lambert function  $W$ . Introduced by  
836 Johann Heinrich Lambert in 1758. In this work we are primarily interested in the property of the  
837 function that for any  $\alpha$ , the solution of the equation:

$$x - \alpha \cdot e^{-x} = 0$$

838 is  $x = W(-\alpha)$ . As well as the monotonicity of the principal branch of the Lambert function.

## 839 E Proof of Lemma 3

840 In this section of the appendix we provide the proof for Lemma 3, under Assumptions 1 and 2, we  
841 start by restating the Lemma below for the sake of exposition.

842 **Lemma 3** (Divergence Logistic Regression). *Let  $w_j^{\mathcal{D}}$ ,  $w_j^{\mathcal{R}}$  and  $w_j^{\text{DA}}$  the  $j^{\text{th}}$  coordinate of the conver-*  
843 *gence point for the logistic regression problem for the original set  $\mathcal{D}$ , the retain set  $\mathcal{R}$  and the Descent*  
844 *Ascent method respectively. Then for a range of  $\alpha$  we have that:  $(w_j^{\text{DA}} - w_j^{\mathcal{D}}) \cdot (w_j^{\mathcal{D}} - w_j^{\mathcal{R}}) \geq 0$ .*

845 *Proof.* To begin the proof let us restate the three minimization problems for logistic regression for  
 846 the three cases, whose respective solutions are  $w_j^{\mathcal{D}}, w_j^{\mathcal{R}}, w_j^{\text{DA}}$

$$\text{minimization } \mathcal{D} : \frac{1}{|\mathcal{D}|} \sum_{i=1}^{\mathcal{D}} e^{-y_i \cdot \langle w, x_i \rangle} + \frac{\lambda}{2} \|w\|_2^2$$

$$\text{minimization } \mathcal{R} : \frac{1}{|\mathcal{R}|} \sum_{i=1}^{\mathcal{R}} e^{-y_i \cdot \langle w, x_i \rangle} + \frac{\lambda}{2} \|w\|_2^2$$

$$\text{Descent } \mathcal{R} - \text{Ascent } \mathcal{F} : \frac{1}{|\mathcal{R}|} \sum_{i=1}^{\mathcal{R}} e^{-y_i \cdot \langle w, x_i \rangle} - \frac{1}{|\mathcal{F}|} \sum_{i=1}^{\mathcal{F}} e^{-y_i \cdot \langle w, x_i \rangle} + \frac{\lambda}{2} \|w\|_2^2$$

847 So the local minima and maxima of these equations can be characterized with the help of Lemma 2,  
 848 the proof of which can be found in App. D, for the sake of completeness, let us restate the lemma  
 849 here

850 **Lemma 2** (Closed Form). *Let  $w_j^{\mathcal{D}}, w_j^{\mathcal{R}}$  and  $w_j^{\text{DA}}$  be the  $j^{\text{th}}$  coordinate of **any** local minima/maxima*  
 851 *for the logistic regression problems defined in Eq. (1), then they admit the form:*

$$w_j^{\mathcal{D}} = W\left(\frac{(1+\alpha)|\mathcal{R}_j|}{\lambda|\mathcal{D}|}\right), w_j^{\mathcal{R}} = W\left(\frac{|\mathcal{R}_j|}{\lambda|\mathcal{R}|}\right), w_j^{\text{DA}} = W\left(\frac{(1-\alpha|\mathcal{R}|/|\mathcal{F}|)|\mathcal{R}_j|}{\lambda|\mathcal{R}|}\right),$$

852 where  $W(z)$  corresponds to the Lambert-W function, the solution to  $z = W(z)e^{W(z)}$ .

Since  $\alpha \geq 0$ , we have that:

$$\frac{(1+\alpha)|\mathcal{R}_j|}{\lambda|\mathcal{D}|} > 0 \text{ and } \frac{|\mathcal{R}_j|}{\lambda|\mathcal{R}|} > 0$$

853 The minimization for logistic regression over the original dataset  $\mathcal{D}$  and the retrain dataset  $\mathcal{R}$  both  
 854 have a global minimum that is unique and corresponds to the solution of the principal branch of the  
 855 Lambert function  $W_0$ , for that value.

856 For the Descent Ascent solution, since the input of the Lambert function is not necessarily positive,  
 857 we have to separate our analysis to three cases:

- 858 1. The first case, where there is only one global minimum, meaning that the input  $x$  of the  
 859 Lambert function is  $x \geq 0$ . Equivalently, we have  $\frac{(1-\alpha|\mathcal{R}|/|\mathcal{F}|)|\mathcal{R}_j|}{\lambda|\mathcal{R}|} \geq 0$  which implies that  
 860  $\alpha \leq \frac{|\mathcal{F}|}{|\mathcal{R}|}$
- 861 2. The second case, where we have a solution both for the primary and the secondary branch of  
 862 the Lambert function, corresponding to a local maximum and minimum respectively meaning  
 863 that you have that the input  $x$  of the Lambert function is  $-1/e \leq x \leq 0$ , equivalently solving  
 864 for  $\epsilon$  gives  $|\mathcal{F}|/|\mathcal{R}| < \alpha \leq |\mathcal{F}|/|\mathcal{R}| + (\lambda|\mathcal{F}|)/(e|\mathcal{R}_j|)$
- 865 3. The third case, where there are no local minima, meaning that the input of the Lambert  
 866 function  $x$  is  $x < -1/e$ , which implies that  $\alpha > |\mathcal{F}|/|\mathcal{R}| + (\lambda|\mathcal{F}|)/(e|\mathcal{R}_j|)$

867 **Case 1:** In case 1 we have that  $\alpha \leq \frac{|\mathcal{F}|}{|\mathcal{R}|}$ , which implies that:

$$\frac{(1+\alpha)|\mathcal{R}_j|}{\lambda|\mathcal{D}|} \leq \frac{(|\mathcal{R}| + |\mathcal{F}|)|\mathcal{R}_j|}{\lambda|\mathcal{R}||\mathcal{D}|} \leq \frac{|\mathcal{D}||\mathcal{R}_j|}{\lambda|\mathcal{R}||\mathcal{D}|} \leq \frac{|\mathcal{R}_j|}{\lambda|\mathcal{R}|}$$

868 so since the principal branch  $W_0$  of the Lambert function is increasing, we have that:

$$w_j^{\mathcal{D}} = W_0\left(\frac{(1+\alpha)|\mathcal{R}_j|}{\lambda|\mathcal{D}|}\right) \leq W_0\left(\frac{|\mathcal{R}_j|}{\lambda|\mathcal{R}|}\right) = w_j^{\mathcal{R}}$$

869 For this case, let us now assume that  $\alpha \geq |\mathcal{F}|^2 / (|\mathcal{R}|(|\mathcal{F}| + |\mathcal{D}|))$ , it is easy to verify that for such an  
 870  $\alpha$  it holds that:  $\frac{(1+\alpha)|\mathcal{R}_j|}{\lambda|\mathcal{D}|} \geq \frac{(1-\alpha|\mathcal{R}|/|\mathcal{F}|)|\mathcal{R}_j|}{\lambda|\mathcal{R}|}$ , so we have that:

$$w_j^{\text{DA}} = W_0\left(\frac{(1-\alpha|\mathcal{R}|/|\mathcal{F}|)|\mathcal{R}_j|}{\lambda|\mathcal{R}|}\right) \leq W_0\left(\frac{(1+\alpha)|\mathcal{R}_j|}{\lambda|\mathcal{D}|}\right) = w_j^{\mathcal{D}}$$



871 So for **Case 1** we have that  $w_j^{\text{DA}} \leq w_j^{\mathcal{D}} \leq w_j^{\mathcal{R}}$ , which implies that  $(w_j^{\text{DA}} - w_j^{\mathcal{D}}) \cdot (w_j^{\mathcal{D}} - w_j^{\mathcal{R}}) \geq 0$

872 This concludes the proof.

873

□

## 874 F Proof of Lemma 4

875 In this section we provide the proof for Lemma 4 under Assumptions 1 and 2.

876 **Lemma 4** (Distance Growth). *Let  $w_j^{\mathcal{D}}, w_j^{\mathcal{R}}$  the  $j^{\text{th}}$  coordinate of the convergence point for the logistic*  
 877 *regression problem for the original set  $\mathcal{D}$  and the retain set  $\mathcal{R}$  respectively. It holds that the distance*  
 878  $\Delta_{\mathcal{R}, \mathcal{D}} = |w_j^{\mathcal{D}} - w_j^{\mathcal{R}}| \leq \left| \ln \left( (1 + \alpha) \frac{|\mathcal{R}|}{|\mathcal{D}|} \right) \right|$ , *for any value of  $\lambda > 0$ .*

879 *Proof.* We start from Lemma 2, which we restate below for the sake of exposition.

880 **Lemma 2** (Closed Form). *Let  $w_j^{\mathcal{D}}, w_j^{\mathcal{R}}$  and  $w_j^{\text{DA}}$  be the  $j^{\text{th}}$  coordinate of **any** local minima/maxima*  
 881 *for the logistic regression problems defined in Eq. (1), then they admit the form:*

$$w_j^{\mathcal{D}} = W \left( \frac{(1 + \alpha)|\mathcal{R}_j|}{\lambda|\mathcal{D}|} \right), w_j^{\mathcal{R}} = W \left( \frac{|\mathcal{R}_j|}{\lambda|\mathcal{R}|} \right), w_j^{\text{DA}} = W \left( \frac{(1 - \alpha|\mathcal{R}|/|\mathcal{F}|)|\mathcal{R}_j|}{\lambda|\mathcal{R}|} \right),$$

882 where  $W(z)$  corresponds to the Lambert-W function, the solution to  $z = W(z)e^{W(z)}$ .

883 Since the input of the Lambert function for  $w_j^{\mathcal{D}}, w_j^{\mathcal{R}}$  is always positive these solutions correspond to  
 884 the only minimum of the function for the minimization problem and additionally they are calculated  
 885 from them principal branch of the Lambert function  $W_0$ . We start from the logarithmic connection of  
 886 the Lambert function, which is that for any value of  $x$  it holds that:

$$W(x) = \ln(x) - \ln(W(x))$$

887 So for  $\alpha \geq \frac{|\mathcal{F}|}{|\mathcal{R}|}$ , since  $W_0$  is increasing we have that  $w_j^{\mathcal{D}} \geq w_j^{\mathcal{R}}$  we have the following:

$$\begin{aligned} \Delta_{\mathcal{R}, \mathcal{D}} &= w_j^{\mathcal{D}} - w_j^{\mathcal{R}} \\ &= W_0 \left( \frac{(1 + \alpha)|\mathcal{R}_j|}{\lambda|\mathcal{D}|} \right) - W_0 \left( \frac{|\mathcal{R}_j|}{\lambda|\mathcal{R}|} \right) \\ &= W_0 \left( \alpha \frac{|\mathcal{R}_j|}{\lambda|\mathcal{R}|} \right) - W_0 \left( \frac{|\mathcal{R}_j|}{\lambda|\mathcal{R}|} \right), \text{ where } \alpha = (1 + \alpha) \frac{|\mathcal{R}|}{|\mathcal{D}|} \\ &= \ln \left( \alpha \frac{|\mathcal{R}_j|}{\lambda|\mathcal{R}|} \right) - \ln \left( W_0 \left( \alpha \frac{|\mathcal{R}_j|}{\lambda|\mathcal{R}|} \right) \right) - \ln \left( \frac{|\mathcal{R}_j|}{\lambda|\mathcal{R}|} \right) + \ln \left( W_0 \left( \frac{|\mathcal{R}_j|}{\lambda|\mathcal{R}|} \right) \right) \\ &= \ln \left( \alpha \frac{|\mathcal{R}_j|}{\lambda|\mathcal{R}|} \right) - \ln \left( W_0 \left( \alpha \frac{|\mathcal{R}_j|}{\lambda|\mathcal{R}|} \right) \right) - \ln \left( \frac{|\mathcal{R}_j|}{\lambda|\mathcal{R}|} \right) + \ln \left( W_0 \left( \frac{|\mathcal{R}_j|}{\lambda|\mathcal{R}|} \right) \right) \\ &= \ln(\alpha) - \ln \left( \frac{W_0 \left( \alpha \frac{|\mathcal{R}_j|}{\lambda|\mathcal{R}|} \right)}{W_0 \left( \frac{|\mathcal{R}_j|}{\lambda|\mathcal{R}|} \right)} \right) \\ &\leq \ln(\alpha), \text{ since the principal branch } W_0 \text{ is increasing} \end{aligned}$$

888 We can repeat the same proof procedure for  $\alpha \leq \frac{|\mathcal{F}|}{|\mathcal{R}|}$ , but instead we get  $\Delta_{\mathcal{R}, \mathcal{D}} \leq -\ln(\alpha)$ . This  
 889 concludes the proof □

## 890 G Proof of Lemma 5

891 **Lemma 5** (Distance Unlearning). *Let  $w_j^{\mathcal{R}}, w_j^{\text{DA}}$  the  $j^{\text{th}}$  coordinate of the convergence point for the*  
 892 *logistic regression problem for the retain set  $\mathcal{R}$  and the Descent Ascent method respectively. It holds*  
 893 *that for for  $\alpha \geq |\mathcal{F}|/|\mathcal{R}|$  the distance  $\Delta_{\mathcal{R}, \text{DA}} = |w_j^{\mathcal{R}} - w_j^{\text{DA}}| \geq W_0(|\mathcal{R}_j|/(\lambda|\mathcal{R}|))$*

894 *Proof.* We start from Lemma 2 which we restate below for the sake of exposition.

895 **Lemma 2** (Closed Form). *Let  $w_j^{\mathcal{D}}$ ,  $w_j^{\mathcal{R}}$  and  $w_j^{\text{DA}}$  be the  $j^{\text{th}}$  coordinate of **any** local minima/maxima*  
 896 *for the logistic regression problems defined in Eq. (1), then they admit the form:*

$$w_j^{\mathcal{D}} = W\left(\frac{(1+\alpha)|\mathcal{R}_j|}{\lambda|\mathcal{D}|}\right), w_j^{\mathcal{R}} = W\left(\frac{|\mathcal{R}_j|}{\lambda|\mathcal{R}|}\right), w_j^{\text{DA}} = W\left(\frac{(1-\alpha|\mathcal{R}|/|\mathcal{F}|)|\mathcal{R}_j|}{\lambda|\mathcal{R}|}\right),$$

897 where  $W(z)$  corresponds to the Lambert-W function, the solution to  $z = W(z)e^{W(z)}$ .

898 It is easy to notice that in the case where we have  $\alpha = |\mathcal{F}|/|\mathcal{R}|$   $w_j^{\text{DA}} = 0$  which concludes this case.  
 899 For the case where  $\alpha > |\mathcal{F}|/|\mathcal{R}|$  we refer the reader to the proof of Lemma 3, where we show that  
 900  $w_j^{\text{DA}} \rightarrow -\infty$  for any value of  $\lambda > 0$  so the distance is infinite in this case.  $\square$

## 901 H Logistic Regression 2 dimensions

902 In this section we will study the natural extension of the previous example, where we were studying  
 903 the 1 dimensional case. In this case we assume that our samples are of the form:

$$s_1 = (1, \epsilon), \quad s_2 = (\epsilon, 1)$$

904 This gives the following equations for the optimality conditions for training on the full data set  $\mathcal{D}$ :

$$\begin{aligned} w_1 &= \frac{|\mathcal{R}_{i,j}|}{\lambda|\mathcal{D}|} (e^{-(w_1+w_2\epsilon)} + \alpha\epsilon e^{-(w_1\epsilon+w_2)}) \\ w_2 &= \frac{|\mathcal{R}_{i,j}|}{\lambda|\mathcal{D}|} (\epsilon e^{-(w_1+w_2\epsilon)} + \alpha e^{-(w_1\epsilon+w_2)}) \end{aligned}$$

905 For the retrain set  $\mathcal{R}$  we have that:

$$\begin{aligned} w_1 &= \frac{|\mathcal{R}_{i,j}|}{\lambda|\mathcal{R}|} e^{-(w_1+w_2\epsilon)} \\ w_2 &= \frac{|\mathcal{R}_{i,j}|}{\lambda|\mathcal{R}|} \epsilon e^{-(w_1+w_2\epsilon)} \end{aligned}$$

906 For the Descent Ascent unlearning we have that:

$$\begin{aligned} w_1 &= \frac{|\mathcal{R}_{i,j}|}{\lambda|\mathcal{R}|} e^{-(w_1+w_2\epsilon)} - \frac{|\mathcal{R}_{i,j}|}{\lambda|\mathcal{F}|} \alpha\epsilon e^{-(w_1\epsilon+w_2)} \\ w_2 &= \frac{|\mathcal{R}_{i,j}|}{\lambda|\mathcal{R}|} \epsilon e^{-(w_1+w_2\epsilon)} - \frac{|\mathcal{R}_{i,j}|}{\lambda|\mathcal{F}|} \alpha e^{-(w_1\epsilon+w_2)} \end{aligned}$$

907 We will now rewrite the above equations by setting  $x = w_1 + w_2\epsilon$  and  $y = w_1\epsilon + w_2$ , this simplifies  
 908 the equations and still allows us to make our claim that DA can only harm the model if there is a total  
 909 ordering over the values of the solutions of the rewritten equations.

910 For the dataset  $\mathcal{D}$  we have:

$$\begin{aligned} x^{\mathcal{D}} &= \frac{|\mathcal{R}_{i,j}|}{\lambda|\mathcal{D}|} ((1+\epsilon^2)e^{-x^{\mathcal{D}}} + 2\alpha\epsilon e^{-y^{\mathcal{D}}}) \\ y^{\mathcal{D}} &= \frac{|\mathcal{R}_{i,j}|}{\lambda|\mathcal{D}|} (2\epsilon e^{-x^{\mathcal{D}}} + \alpha(1+\epsilon^2)e^{-y^{\mathcal{D}}}) \end{aligned}$$

911 For the retrain set  $\mathcal{R}$ , we have that:

$$\begin{aligned}
x^{\mathcal{R}} &= \frac{|\mathcal{R}_{i,j}|}{\lambda|\mathcal{R}|}(1 + \epsilon^2)e^{-x^{\mathcal{R}}} \\
y^{\mathcal{R}} &= \frac{|\mathcal{R}_{i,j}|}{\lambda|\mathcal{R}|}2\epsilon e^{-x^{\mathcal{R}}}
\end{aligned}$$

912 For the DA method we get the following equations:

$$\begin{aligned}
x^{\text{DA}} &= \frac{|\mathcal{R}_{i,j}|}{\lambda|\mathcal{R}|}(1 + \epsilon^2)e^{-x^{\text{DA}}} - \frac{|\mathcal{R}_{i,j}|}{\lambda|\mathcal{F}|}\alpha 2\epsilon e^{-y^{\text{DA}}} \\
y^{\text{DA}} &= \frac{|\mathcal{R}_{i,j}|}{\lambda|\mathcal{R}|}2\epsilon e^{-x^{\text{DA}}} - \frac{|\mathcal{R}_{i,j}|}{\lambda|\mathcal{F}|}\alpha(1 + \epsilon^2)e^{-y^{\text{DA}}}
\end{aligned}$$

913 Before proceeding, let us point out that  $y^{\text{DA}} \leq x^{\text{DA}}$ , since  $1 + \epsilon^2 \geq 2\epsilon$ , for the same reason, we get  
914 that  $y^{\mathcal{R}} \leq x^{\mathcal{R}}$  and finally without loss of generality we will use that  $y^{\mathcal{D}} \leq x^{\mathcal{D}}$ . In Lemma 12 we  
915 give a short proof regarding the existence of such solutions.

916 **Lemma 12.** *For any  $\alpha \leq 1$ , we have that there exists a solution for the original dataset, such that*  
917  *$y^{\mathcal{D}} \leq x^{\mathcal{D}}$*

918 *Proof.* For  $\alpha = 1$  we get that there exists a solution of the system such that  $y^{\mathcal{D}} \leq x^{\mathcal{D}}$  by the  
919 symmetry of the system. For  $\alpha \leq 1$ . In order to demonstrate that there exists a solution for the  
920 system such that  $y^{\mathcal{D}} \leq x^{\mathcal{D}}$  we will employ the nonlinear Gauss-Sidel method, which converges to a  
921 stationary point (minimum) for logistic regression. The proof goes as follows, we will initialize our  
922 algorithm in the solution for  $\alpha = 1$  let it be  $x_0, y_0$  and we know it holds that  $x_0 \geq y_0$ . We will follow  
923 the following update: (nonlinear Gauss-Sidel method starting from  $y$ )

$$\begin{aligned}
y_{k+1} &\leftarrow 2b\epsilon e^{-x_k} + W\left(b\alpha(1 + \epsilon^2)e^{-2b\epsilon e^{-x_k}}\right) \\
x_{k+1} &\leftarrow 2b\alpha\epsilon e^{-y_k} + W\left(b(1 + \epsilon^2)e^{-2b\alpha\epsilon e^{-y_k}}\right)
\end{aligned}$$

924 For  $y_1$  we have that:

$$\begin{aligned}
y_1 &= 2b\epsilon e^{-x_0} + W\left(b\alpha(1 + \epsilon^2)e^{-2b\epsilon e^{-x_0}}\right) \\
&= 2b\epsilon e^{-x_0} + W\left(b\alpha(1 + \epsilon^2)e^{-2b\epsilon e^{-x_0}}\right) - W\left(b(1 + \epsilon^2)e^{-2b\epsilon e^{-x_0}}\right) + W\left(b(1 + \epsilon^2)e^{-2b\epsilon e^{-x_0}}\right) \\
&= y_0 + W\left(b\alpha(1 + \epsilon^2)e^{-2b\epsilon e^{-x_0}}\right) - W\left(b(1 + \epsilon^2)e^{-2b\epsilon e^{-x_0}}\right)
\end{aligned}$$

925 and since  $W$  is increasing we have that  $W\left(b\alpha(1 + \epsilon^2)e^{-2b\epsilon e^{-x_0}}\right) - W\left(b(1 + \epsilon^2)e^{-2b\epsilon e^{-x_0}}\right) < 0$   
926 implying that  $y_1 < y_0$ . Now let us define the function  $f(x) = x + W(ce^{-x})$  the function is  
927 increasing on  $x$  therefore since  $y_1 < y_0$  we get that:  $x_1 = f(2b\alpha\epsilon e^{-y_1}) > f(2b\alpha\epsilon e^{-y_0}) = x_0$ . Let  
928 us proceed with an induction step, we assume that we have  $x_k > x_{k-1}$  and  $y_k < y_{k-1}$  for  $k \geq 1$ . We  
929 will show that  $y_{k+1} < y_k$  which directly implies that  $x_{k+1} = f(2b\alpha\epsilon e^{-y_{k+1}}) > f(2b\alpha\epsilon e^{-y_k}) = x_k$   
930 completing the inductive step.

$$\begin{aligned}
y_{k+1} &= 2b\epsilon e^{-x_k} + W\left(b\alpha(1 + \epsilon^2)e^{-2b\epsilon e^{-x_k}}\right) \\
&= f(2b\epsilon e^{-x_k}) < f(2b\epsilon e^{-x_{k-1}}) \\
&= y_k
\end{aligned}$$

931 This concludes the inductive step and we therefore have that for all  $k$   $y_k \leq x_k$  for any  $\alpha$ , as a  
932 result, since the method converges to the solution of the system there exists a solution which satisfies  
933  $y^{\mathcal{D}} \leq x^{\mathcal{D}}$ . In the proof above we have that  $b = |\mathcal{R}_{i,j}|/\lambda|\mathcal{D}|$   $\square$

## 934 H.1 Characterization of the solutions of the 2d Logistic regression

935 We start this section by giving an exact solution for the coordinates of the retrain problem.

**Lemma 6.** *The closed form solution for the stationary points for the retrain set is given as:*

$$x^{\mathcal{R}} = W\left(\frac{(1+\epsilon^2)|R_{i,j}|}{\lambda|\mathcal{R}|}\right), \quad y^{\mathcal{R}} = \frac{2\epsilon}{1+\epsilon^2} W\left(\frac{(1+\epsilon^2)|R_{i,j}|}{\lambda|\mathcal{R}|}\right).$$

936 *Proof.* We have that:

$$x^{\mathcal{R}} = \frac{|\mathcal{R}_{i,j}|}{\lambda|\mathcal{R}|}(1+\epsilon^2)e^{-x^{\mathcal{R}}} \rightarrow x^{\mathcal{R}} = W\left(\frac{(1+\epsilon^2)|\mathcal{R}_{i,j}|}{\lambda|\mathcal{R}|}\right)$$

937 So:

$$\begin{aligned} y^{\mathcal{R}} &= \frac{|\mathcal{R}_{i,j}|}{\lambda|\mathcal{R}|} 2\epsilon e^{-x^{\mathcal{R}}} \\ &= \frac{2\epsilon}{1+\epsilon^2} \frac{(1+\epsilon^2)|\mathcal{R}_{i,j}|}{\lambda|\mathcal{R}|} e^{-W\left(\frac{(1+\epsilon^2)|\mathcal{R}_{i,j}|}{\lambda|\mathcal{R}|}\right)} \\ &= \frac{2\epsilon}{1+\epsilon^2} W\left(\frac{(1+\epsilon^2)|\mathcal{R}_{i,j}|}{\lambda|\mathcal{R}|}\right) \end{aligned}$$

938 This concludes the proof. In the last equality we used the property of the Lambert function.  $\square$

939 For the other two problems it is not possible to provide exact solutions, as we did in the retrain one  
940 unfortunately, so we will provide upper and lower bounds for their values.

941 **Lemma 7.** *For the stationary points of the original set, one can derive the following ranges.*

$$\begin{aligned} W\left(\frac{|R_{i,j}|}{\lambda|\mathcal{D}|}((1+\epsilon^2)+2\alpha\epsilon)\right) &\leq x^{\mathcal{D}} \leq \frac{2\epsilon}{1+\epsilon^2} W\left(\frac{\alpha(1+\epsilon^2)|R_{i,j}|}{\lambda|\mathcal{D}|}\right) + W\left(\frac{(1+\epsilon^2)|R_{i,j}|}{\lambda|\mathcal{D}|}\right), \\ W\left(\frac{\alpha(1+\epsilon^2)|R_{i,j}|}{\lambda|\mathcal{D}|}\right) &\leq y^{\mathcal{D}} \leq W\left(\frac{|R_{i,j}|}{\lambda|\mathcal{D}|}(2\epsilon+\alpha(1+\epsilon^2))\right). \end{aligned}$$

942 *Proof.* We have that

$$\begin{aligned} x^{\mathcal{D}} &= \frac{1}{\lambda|\mathcal{D}|}((1+\epsilon^2)e^{-x^{\mathcal{D}}} + 2\alpha\epsilon e^{-y^{\mathcal{D}}}) \\ y^{\mathcal{D}} &= \frac{1}{\lambda|\mathcal{D}|}(2\epsilon e^{-x^{\mathcal{D}}} + \alpha(1+\epsilon^2)e^{-y^{\mathcal{D}}}) \end{aligned}$$

943 As we discuss above we have that  $y^{\mathcal{D}} \leq x^{\mathcal{D}} \Rightarrow e^{-y^{\mathcal{D}}} \geq e^{-x^{\mathcal{D}}}$ , which implies that:

$$\begin{aligned} x^{\mathcal{D}} &\geq \frac{|\mathcal{R}_{i,j}|}{\lambda|\mathcal{D}|}((1+\epsilon^2)e^{-x^{\mathcal{D}}} + 2\alpha\epsilon e^{-x^{\mathcal{D}}}) = \frac{|\mathcal{R}_{i,j}|}{\lambda|\mathcal{D}|}((1+\epsilon^2)+2\alpha\epsilon)e^{-x^{\mathcal{D}}} \\ y^{\mathcal{D}} &\leq \frac{|\mathcal{R}_{i,j}|}{\lambda|\mathcal{D}|}(2\epsilon e^{-y^{\mathcal{D}}} + \alpha(1+\epsilon^2)e^{-y^{\mathcal{D}}}) = \frac{|\mathcal{R}_{i,j}|}{\lambda|\mathcal{D}|}(2\epsilon+\alpha(1+\epsilon^2))e^{-y^{\mathcal{D}}} \end{aligned}$$

944 So from the inequalities above, we get that:

$$\begin{aligned} x^{\mathcal{D}} &\geq W\left(\frac{|\mathcal{R}_{i,j}|}{\lambda|\mathcal{D}|}((1+\epsilon^2)+2\alpha\epsilon)\right) \\ y^{\mathcal{D}} &\leq W\left(\frac{|\mathcal{R}_{i,j}|}{\lambda|\mathcal{D}|}(2\epsilon+\alpha(1+\epsilon^2))\right) \end{aligned}$$

945 Now we have an upper bound for  $y^{\mathcal{D}}$  and a lower bound for  $x^{\mathcal{D}}$ . In order to provide a lower bound  
946 for  $y^{\mathcal{D}}$  and an upper bound for  $x^{\mathcal{D}}$ . We should notice that  $2\epsilon e^{-x^{\mathcal{D}}} \geq 0$ , which gives:

$$\begin{aligned} y^{\mathcal{D}} &\geq \frac{|\mathcal{R}_{i,j}|}{\lambda|\mathcal{D}|} \alpha(1+\epsilon^2)e^{-y^{\mathcal{D}}} \Rightarrow \\ y^{\mathcal{D}} &\geq W\left(\frac{\alpha(1+\epsilon^2)|\mathcal{R}_{i,j}|}{\lambda|\mathcal{D}|}\right) \end{aligned}$$

947 This completes the bounds for  $y^{\mathcal{D}}$ , now in order to compute the upper bound for  $x^{\mathcal{D}}$ , we have that:

$$\begin{aligned} e^{-y^{\mathcal{D}}} &\leq e^{-W(\alpha(1+\epsilon^2)|\mathcal{R}_{i,j}|/(\lambda|\mathcal{D}|))} \Rightarrow \\ e^{-y^{\mathcal{D}}} &\leq \frac{\lambda|\mathcal{D}|}{\alpha(1+\epsilon^2)|\mathcal{R}_{i,j}|} \frac{\alpha(1+\epsilon^2)|\mathcal{R}_{i,j}|}{\lambda|\mathcal{D}|} e^{-W(\alpha(1+\epsilon^2)|\mathcal{R}_{i,j}|/(\lambda|\mathcal{D}|))} \Rightarrow \\ e^{-y^{\mathcal{D}}} &\leq \frac{\lambda|\mathcal{D}|}{\alpha(1+\epsilon^2)|\mathcal{R}_{i,j}|} W\left(\frac{\alpha(1+\epsilon^2)|\mathcal{R}_{i,j}|}{\lambda|\mathcal{D}|}\right) \end{aligned}$$

948 So we have that:

$$\begin{aligned} x^{\mathcal{D}} &\leq \frac{|\mathcal{R}_{i,j}|}{\lambda|\mathcal{D}|} ((1+\epsilon^2)e^{-x^{\mathcal{D}}} + 2\alpha\epsilon \frac{\lambda|\mathcal{D}|}{\alpha(1+\epsilon^2)|\mathcal{R}_{i,j}|} W\left(\frac{\alpha(1+\epsilon^2)}{\lambda|\mathcal{D}|}\right)) \Rightarrow \\ x^{\mathcal{D}} &\leq \frac{(1+\epsilon^2)|\mathcal{R}_{i,j}|}{\lambda|\mathcal{D}|} e^{-x^{\mathcal{D}}} + \frac{2\epsilon}{1+\epsilon^2} W\left(\frac{\alpha(1+\epsilon^2)|\mathcal{R}_{i,j}|}{\lambda|\mathcal{D}|}\right) \Rightarrow \\ x^{\mathcal{D}} &\leq \frac{2\epsilon}{1+\epsilon^2} W\left(\frac{\alpha(1+\epsilon^2)|\mathcal{R}_{i,j}|}{\lambda|\mathcal{D}|}\right) + W\left(\frac{(1+\epsilon^2)|\mathcal{R}_{i,j}|}{\lambda|\mathcal{D}|} e^{-\frac{2\epsilon}{1+\epsilon^2} W\left(\frac{\alpha(1+\epsilon^2)|\mathcal{R}_{i,j}|}{\lambda|\mathcal{D}|}\right)}\right) \Rightarrow \\ x^{\mathcal{D}} &\leq \frac{2\epsilon}{1+\epsilon^2} W\left(\frac{\alpha(1+\epsilon^2)|\mathcal{R}_{i,j}|}{\lambda|\mathcal{D}|}\right) + W\left(\frac{(1+\epsilon^2)|\mathcal{R}_{i,j}|}{\lambda|\mathcal{D}|}\right) \end{aligned}$$

949 where the third inequality comes from the solution of the Lambert equation for the RHS of the  
950 inequality and the last one comes from the fact that the exponent is non positive. This completes  
951 the proof.  $\square$

952 **Lemma 8.** For the stationary points of the model trained by DA methods we can derive the following  
953 ranges.

$$x^{DA} \leq W\left(\frac{|\mathcal{R}_{i,j}|}{\lambda|\mathcal{R}|}(1+\epsilon^2) - \frac{|\mathcal{R}_{i,j}|}{\lambda|\mathcal{F}|}\alpha 2\epsilon\right), \quad y^{DA} \leq W\left(\frac{|\mathcal{R}_{i,j}|}{\lambda|\mathcal{R}|}2\epsilon - \frac{|\mathcal{R}_{i,j}|}{\lambda|\mathcal{F}|}\alpha(1+\epsilon^2)\right).$$

954 *Proof.* As stated earlier we have that  $y^{DA} \leq x^{DA} \Rightarrow e^{-y^{DA}} \geq e^{-x^{DA}}$  and

$$\begin{aligned} x^{DA} &= \frac{|\mathcal{R}_{i,j}|}{\lambda|\mathcal{R}|}(1+\epsilon^2)e^{-x^{DA}} - \frac{|\mathcal{R}_{i,j}|}{\lambda|\mathcal{F}|}\alpha 2\epsilon e^{-y^{DA}} \\ y^{DA} &= \frac{|\mathcal{R}_{i,j}|}{\lambda|\mathcal{R}|}2\epsilon e^{-x^{DA}} - \frac{|\mathcal{R}_{i,j}|}{\lambda|\mathcal{F}|}\alpha(1+\epsilon^2)e^{-y^{DA}} \end{aligned}$$

955 So:

$$\begin{aligned} x^{DA} &\leq \left(\frac{|\mathcal{R}_{i,j}|}{\lambda|\mathcal{R}|}(1+\epsilon^2) - \frac{|\mathcal{R}_{i,j}|}{\lambda|\mathcal{F}|}\alpha 2\epsilon\right) e^{-x^{DA}} \\ y^{DA} &\leq \left(\frac{|\mathcal{R}_{i,j}|}{\lambda|\mathcal{R}|}2\epsilon - \frac{|\mathcal{R}_{i,j}|}{\lambda|\mathcal{F}|}\alpha(1+\epsilon^2)\right) e^{-y^{DA}} \end{aligned}$$

956 So we get that:

$$\begin{aligned} x^{DA} &\leq W\left(\frac{|\mathcal{R}_{i,j}|}{\lambda|\mathcal{R}|}(1+\epsilon^2) - \frac{|\mathcal{R}_{i,j}|}{\lambda|\mathcal{F}|}\alpha 2\epsilon\right) \\ y^{DA} &\leq W\left(\frac{|\mathcal{R}_{i,j}|}{\lambda|\mathcal{R}|}2\epsilon - \frac{|\mathcal{R}_{i,j}|}{\lambda|\mathcal{F}|}\alpha(1+\epsilon^2)\right) \end{aligned}$$

957 which concludes the proof.  $\square$

## 958 H.2 Derivation of the relevant size of the forget set

959 **Lemma 9.** For  $\alpha \geq \alpha^{\mathcal{D} > DA} = \max\left\{\frac{1+\epsilon^2}{2\epsilon} \frac{|\mathcal{F}|^2}{|\mathcal{R}|(|\mathcal{D}|+|\mathcal{F}|)}, \frac{2\epsilon}{1+\epsilon^2} \frac{|\mathcal{F}||\mathcal{D}|}{|\mathcal{R}|(|\mathcal{D}|+|\mathcal{F}|)}\right\}$  we have that  $x^{\mathcal{D}} \geq x^{DA}$   
960 and that  $y^{\mathcal{D}} \geq y^{DA}$ .

961 *Proof.* We will start from Lemma 7 and Lemma 8, which we restate both below for the sake of  
 962 exposition.

963 **Lemma 7.** *For the stationary points of the original set, one can derive the following ranges.*

$$\begin{aligned} W\left(\frac{|R_{i,j}|}{\lambda|\mathcal{D}|}((1+\epsilon^2)+2\alpha\epsilon)\right) &\leq x^{\mathcal{D}} \leq \frac{2\epsilon}{1+\epsilon^2}W\left(\frac{\alpha(1+\epsilon^2)|R_{i,j}|}{\lambda|\mathcal{D}|}\right) + W\left(\frac{(1+\epsilon^2)|R_{i,j}|}{\lambda|\mathcal{D}|}\right), \\ W\left(\frac{\alpha(1+\epsilon^2)|R_{i,j}|}{\lambda|\mathcal{D}|}\right) &\leq y^{\mathcal{D}} \leq W\left(\frac{|R_{i,j}|}{\lambda|\mathcal{D}|}(2\epsilon+\alpha(1+\epsilon^2))\right). \end{aligned}$$

964 **Lemma 8.** *For the stationary points of the model trained by DA methods we can derive the following*  
 965 *ranges.*

$$x^{DA} \leq W\left(\frac{|R_{i,j}|}{\lambda|\mathcal{R}|}(1+\epsilon^2) - \frac{|R_{i,j}|}{\lambda|\mathcal{F}|}\alpha 2\epsilon\right), \quad y^{DA} \leq W\left(\frac{|R_{i,j}|}{\lambda|\mathcal{R}|}2\epsilon - \frac{|R_{i,j}|}{\lambda|\mathcal{F}|}\alpha(1+\epsilon^2)\right).$$

966 We will require that the lower bounds provided for  $x^{\mathcal{D}}, y^{\mathcal{D}}$  are bigger than the upper bounds provided  
 967 for  $x^{DA}, y^{DA}$ , since the Lambert function  $W$  is monotone, we can just solve both inequalities for  $\alpha$ ,  
 968  $x^{\mathcal{D}} \geq x^{DA}$  and  $y^{\mathcal{D}} \geq y^{DA}$  and this concludes the proof.  $\square$

969 Finally we need to find the range of  $\alpha$  for which it holds that  $x^{\mathcal{R}} \geq x^{\mathcal{D}}$  and  $y^{\mathcal{R}} \geq y^{\mathcal{D}}$ , which is given  
 970 in Lemma 10, which we restate next for the sake of exposition.

971 **Lemma 10.** *For  $\alpha \leq \alpha^{\mathcal{R}>\mathcal{D}} = \min\{\alpha_x^{\mathcal{R}>\mathcal{D}}, \alpha_y^{\mathcal{R}>\mathcal{D}}\}$  we have that  $x^{\mathcal{R}} \geq x^{\mathcal{D}}$  and that  $y^{\mathcal{R}} \geq y^{\mathcal{D}}$ ,*  
 972 *with  $\alpha_x^{\mathcal{R}>\mathcal{D}}, \alpha_y^{\mathcal{R}>\mathcal{D}}$ .*

973 *Proof.* We will use Lemma 7 and Lemma 6. Again similar to Lemma 9 we can solve for  $\alpha$  and we  
 974 get the expressions that solve the  $x^{\mathcal{R}} > x^{\mathcal{D}}, y^{\mathcal{R}} > y^{\mathcal{D}}$  equations. Solving  $x^{\mathcal{R}} = x^{\mathcal{D}}$

$$\alpha_x^{\mathcal{R}>\mathcal{D}} = \frac{D\lambda\left(W\left(\frac{\epsilon^2+1}{\lambda R}\right) - W\left(\frac{\epsilon^2+1}{D\lambda}\right)\right) \exp\left(\frac{(\epsilon^2+1)\left(W\left(\frac{\epsilon^2+1}{\lambda R}\right) - W\left(\frac{\epsilon^2+1}{D\lambda}\right)\right)}{2\epsilon}}{2\epsilon}, \quad (6)$$

975 where for any  $\alpha < \alpha_x^{\mathcal{R}>\mathcal{D}}$  there is a range of  $\epsilon$  for which  $x^{\mathcal{R}} > x^{\mathcal{D}}$ .

976 Similarly, solving  $y^{\mathcal{R}} = y^{\mathcal{D}}$

$$\alpha_y^{\mathcal{R}>\mathcal{D}} = \frac{2\epsilon\left(D\lambda e^{\frac{2\epsilon W\left(\frac{\epsilon^2+1}{\lambda R}\right)}{\epsilon^2+1}}W\left(\frac{\epsilon^2+1}{\lambda R}\right) - \epsilon^2 - 1\right)}{(\epsilon^2+1)^2}, \quad (7)$$

977 where for any  $\alpha < \alpha_y^{\mathcal{R}>\mathcal{D}}$  there is a range of  $\epsilon$  for which  $y^{\mathcal{R}} > y^{\mathcal{D}}$ .

978 The solution is therefore  $\alpha \leq \min[\alpha_x^{\mathcal{R}>\mathcal{D}}, \alpha_y^{\mathcal{R}>\mathcal{D}}]$ .  $\square$

## 979 I Logistic Regression in 2D intuition

980 Let us consider nearly orthogonal data, such that all coordinates apart from two are orthogonal to each  
 981 other. Namely, we choose the first two samples to be  $x_1 = (1, \epsilon, 0, \dots, 0)$  and  $x_2 = (\epsilon, 1, 0, \dots, 0)$ ,  
 982 while the remaining  $d-2$  points are orthogonal such that  $x_a = e_a$  for  $a = 3, \dots, d$ , where  $e_a$  are  
 983 the unit vectors. We further assume that the two correlated samples  $x_1, x_2$  share the same label  
 984  $y_1 = y_2 = 1$ . In this case, the unlearning problem decouples the first 2 dimensions from the rest,  
 985 leaving a coupled set of equations for the weights along the first two directions  $w_1, w_2$  for the original  
 986 classification problem

$$w_1 = \frac{1}{\lambda|\mathcal{D}|}(e^{-(w_1+w_2\epsilon)} + \epsilon e^{-(w_1\epsilon+w_2)}), \quad w_2 = \frac{1}{\lambda|\mathcal{D}|}(\epsilon e^{-(w_1+w_2\epsilon)} + e^{-(w_1\epsilon+w_2)}), \quad (8)$$

987 which can be solved in the limit of  $\epsilon \rightarrow 1^-$ , as

$$w_1 = w_2 = \frac{1}{2}W \left( \frac{2(\epsilon + 1)}{\lambda|\mathcal{D}|} \right). \quad (9)$$

988 The retrain problem has the minimum at

$$w_1 = \frac{1}{\lambda|\mathcal{R}|}e^{-(w_1+w_2\epsilon)}, \quad w_2 = \frac{1}{\lambda|\mathcal{R}|}\epsilon e^{-(w_1+w_2\epsilon)}, \quad (10)$$

989 and the DA is given by

$$w_1 = \frac{1}{\lambda|\mathcal{R}|}(e^{-(w_1+w_2\epsilon)} - \epsilon e^{-(w_1\epsilon+w_2)}), \quad w_2 = \frac{1}{\lambda|\mathcal{R}|}(\epsilon e^{-(w_1+w_2\epsilon)} - e^{-(w_1\epsilon+w_2)}). \quad (11)$$

990 Our goal is to study how far is the solution given by GDA from the one given by retraining. The  
991 retrained solution can be found analytically to be

$$w_1 = \frac{W \left( \frac{\epsilon^2+1}{|\mathcal{R}|\lambda} \right)}{\epsilon^2 + 1}, \quad w_2 = \frac{\epsilon W \left( \frac{\epsilon^2+1}{|\mathcal{R}|\lambda} \right)}{\epsilon^2 + 1}. \quad (12)$$

992 The GDA equations do not obtain a closed form solution, but they can be solved when assuming  
993  $\epsilon \rightarrow 1^-$ , such that

$$w_1 = \frac{e^{-w_1-w_2}(w_1-w_2-1)(\epsilon-1)}{\lambda|\mathcal{R}|}, \quad w_2 = \frac{e^{-w_1-w_2}(w_1-w_2+1)(\epsilon-1)}{\lambda|\mathcal{R}|} \quad (13)$$

994 which are solved as

$$\begin{aligned} w_1 &= \frac{1}{4} \left( W \left( -\frac{8(\epsilon-1)^2}{|\mathcal{R}|^2\lambda^2} \right) - i\sqrt{2} \sqrt{W \left( -\frac{8(\epsilon-1)^2}{|\mathcal{R}|^2\lambda^2} \right)} \right), \\ w_2 &= \frac{1}{4} \left( W \left( -\frac{8(\epsilon-1)^2}{|\mathcal{R}|^2\lambda^2} \right) + i\sqrt{2} \sqrt{W \left( -\frac{8(\epsilon-1)^2}{|\mathcal{R}|^2\lambda^2} \right)} \right). \end{aligned} \quad (14)$$

995 It is sufficiently interesting to consider the sum of  $w_1 + w_2$  compared to the retrained solution, and  
996 define the difference

$$\begin{aligned} \Delta &= w_1^{\text{DA}} + w_2^{\text{DA}} - (w_1^{\text{Re}} + w_2^{\text{Re}}) = \frac{1}{2}W \left( -\frac{8(\epsilon-1)^2}{|\mathcal{R}|^2\lambda^2} \right) - \frac{(1+\epsilon)W \left( \frac{\epsilon^2+1}{|\mathcal{R}|\lambda} \right)}{\epsilon^2 + 1} \\ &\stackrel{\epsilon \rightarrow 1^-}{=} -W \left( \frac{2}{|\mathcal{R}|\lambda} \right) \end{aligned} \quad (15)$$

## 997 J Experimental details

998 **Hyperparameters** Following Georgiev et al. [38] we pretrain ResNet-9 for 24 epochs using  
999 stochastic gradient descent (SGD) with an initial learning rate of 0.4, following a cyclic schedule that  
1000 peaks at epoch 5. We employ a batch size of 512, momentum of 0.9, and a weight-decay coefficient  
1001 of  $5 \times 10^{-4}$ .

1002 We also adopt nine forget sets directly from Georgiev et al. [38], which comprise both random  
1003 subsets and semantically coherent subpopulations identified via principal-component analysis of the  
1004 datamodel influence matrix. To construct them, an  $n \times n$  datamodel matrix is formed by concatenating  
1005 “trainxtrain” datamodels (with  $n = 50\,000$ ) by computing its top principal components (PCs) then  
1006 we can define:

- 1007 1. **Forget set 1:** 10 random samples.
- 1008 2. **Forget set 2:** 100 random samples.
- 1009 3. **Forget set 3:** 500 random samples.
- 1010 4. **Forget set 4:** 10 samples with the highest projection onto the 1st PC.

- 1011 5. **Forget set 5:** 100 samples with the highest projection onto the 1st PC.
- 1012 6. **Forget set 6:** 250 samples with the highest and 250 samples with the lowest projection onto
- 1013 the 1st PC.
- 1014 7. **Forget set 7:** 10 samples with the highest projection onto the 2nd PC.
- 1015 8. **Forget set 8:** 100 samples with the highest projection onto the 2nd PC.
- 1016 9. **Forget set 9:** 250 samples with the highest and 250 samples with the lowest projection onto
- 1017 the 2nd PC.

1018 Most unlearning algorithms are highly sensitive to the choice of forget set and hyperparameters.  
 1019 Therefore we perform an extensive hyperparameter exploration, evaluating each baseline unlearning  
 1020 algorithm on each forget set. Our setting is again similar to Georgiev et al. [38] but we consider a  
 1021 slightly larger hyperparameter grid for the employed methods and report results for all configurations  
 1022 rather than only the best-performing runs. More specifically, we evaluate over the Cartesian product  
 1023 of the following hyperparameter grids:

- 1024 • **Gradient Ascent:** Optimized with SGD. Learning rates:  $\{1 \times 10^{-5}, 5 \times 10^{-5}, 1 \times 10^{-4}, 5 \times$   
 1025  $10^{-4}, 1 \times 10^{-3}, 1 \times 10^{-2}, 5 \times 10^{-2}\}$ ; epochs:  $\{1, 3, 5, 7, 10\}$ .
- 1026 • **Gradient Descent/Ascent:** Optimized with SGD. Learning rates:  $\{5 \times 10^{-5}, 5 \times 10^{-4}, 1 \times$   
 1027  $10^{-3}, 5 \times 10^{-3}\}$ ; total epochs:  $\{5, 7, 10\}$ ; ascent epochs:  $\{3, 5\}$ ; forget batch size:  $\{32, 64\}$ .
- 1028 • **SCRUB:** Optimized with SGD. Learning rates:  $\{5 \times 10^{-5}, 5 \times 10^{-4}, 1 \times 10^{-3}, 5 \times 10^{-3}\}$ ;  
 1029 total epochs:  $\{5, 7, 10\}$ ; ascent epochs:  $\{3, 5\}$ ; forget batch size:  $\{32, 64\}$ .

1030 We use a fixed batch size of 64 and train 100 models per configuration. For each run, we measure  
 1031 performance using the 95-th percentile of KLoM scores.

1032 **Statistical Significance** Using  $N = 100$  models to compute KLoM is computationally expensive  
 1033 although such expense comes at the gain of having low variance and results closely reproducing  
 1034 Georgiev et al. [38]. We find using lower values such as  $N = 20$ ,  $N = 50$  to produce large differences  
 1035 between margin distributions of pretrained and oracle models on the retain and validation sets (where  
 1036 KLoM should be low). More specifically, margin distributions become stable for all sets after  $N = 80$ .  
 1037 Reporting the 95-th percentile of KLoM scores follows the methodology established on Georgiev  
 1038 et al. [38]. Furthermore, reporting all runs instead of just the best one for each compute cost is more  
 1039 statistically transparent.

1040 **Compute resources** All experiments were conducted on a server equipped with eight NVIDIA  
 1041 A100-SXM4 GPUs, each with 80 GB of GPU memory. A single unlearning configuration run was  
 1042 never split across different GPUs, many configurations were executed in parallel.

## 1043 K Additional Experiments

1044 We provide additional analysis of the KLoM scores across various unlearning methods and forget  
 1045 sets. Fig. 6 presents the KLoM scores of Gradient Ascent, Gradient Descent/Ascent, and SCRUB.  
 1046 We observe that increasing the size of the forget set or including high-influence points significantly  
 1047 reduces the likelihood of achieving successful unlearning. Fig. 7 shows analogous results, but with  
 1048 KLoM scores computed over the retain set instead of the validation set. The patterns are nearly  
 1049 identical to those in Fig. 6. A pretrained model typically exhibits low KLoM scores on both validation  
 1050 and retain sets, with very similar magnitudes.

## 1051 L Broader Societal Impact

1052 Machine unlearning is crucial for privacy applications, namely, protecting sensitive data and comply-  
 1053 ing with GDPR’s ‘right to be forgotten’. Our work, although mainly theoretical, demonstrates that  
 1054 descent-ascent methods often fail due to unacknowledged statistical dependencies between forget  
 1055 and retain sets. This finding has a critical consequence for privacy: to improve ascent based methods,  
 1056 practitioners are required to probe the retain set to understand its correlations with the forget set. This  
 1057 re-assessment of potentially sensitive data in the retain set during an unlearning task creates a privacy



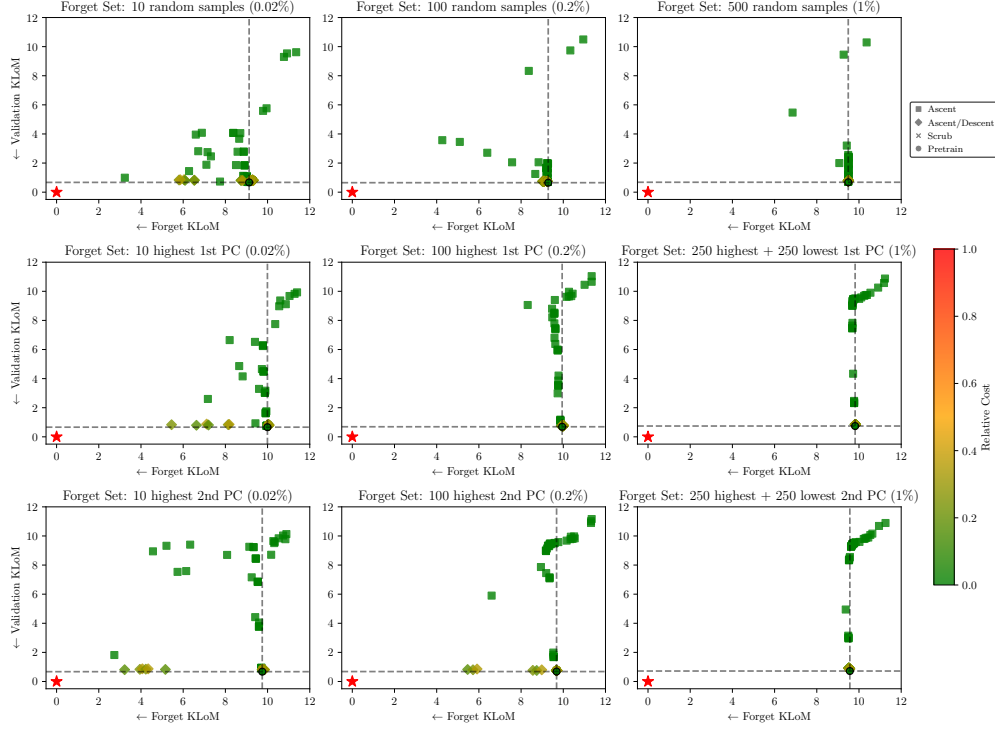

Figure 6: We present the KLoM scores of Gradient Ascent, Gradient Descent/Ascent and SCRUB when unlearning over each one of the forget sets (axes and points follow Fig. 1). We find an increase in forget set size and containing high influence points to strongly decrease the likelihood of any run achieving successful unlearning. For SCRUB we observe that runs remain close to the pretrained model in terms of KLoM scores under our experimental setup.

1058 paradox. Therefore, for applications strictly governed by privacy, alternative unlearning strategies  
 1059 that do not require such re-examination of retained data appear preferable.

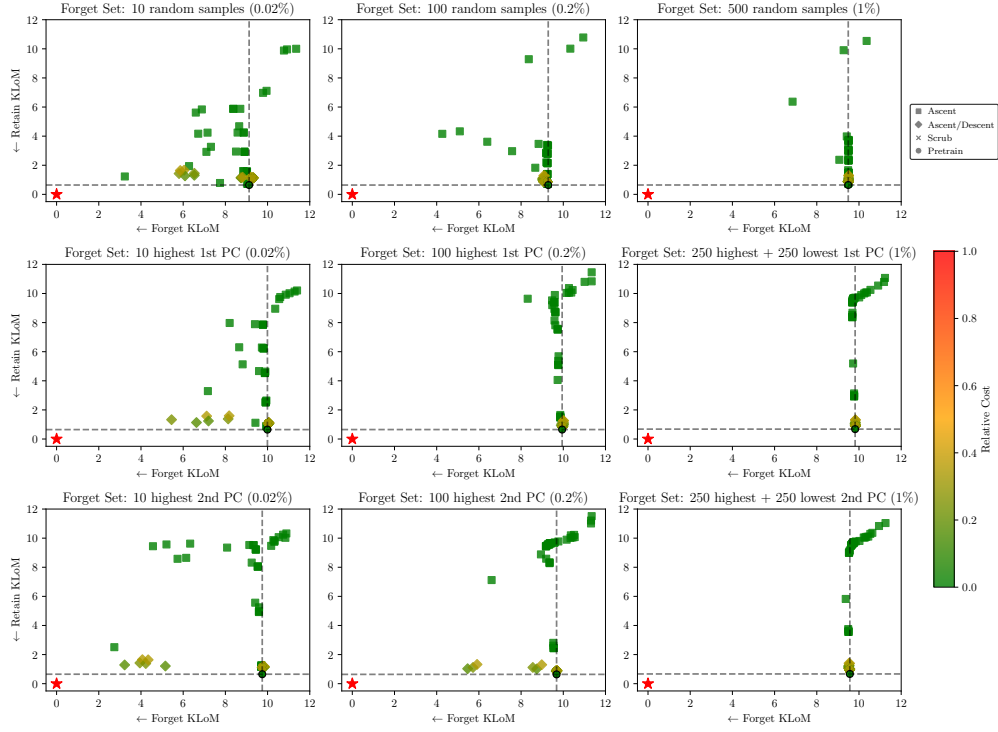

Figure 7: We present the KLoM scores of Gradient Ascent, Gradient Descent/Ascent and SCRUB when unlearning over each forget set. x-axis and points follow Fig. 1 and y-axis now displays the KLoM score in the retain set instead of the validation set. We observe very little difference when comparing with the results in Fig. 6. A pretrained model has low KLoM scores on both the validation and retain sets with very similar magnitudes. These findings are consistent with Georgiev et al. [38].
